# Supplementary material for: Zuo Gui Wan Restores Bone Metabolism in Postmenopausal Osteoporosis through HIF-1 and PI3K–Akt Pathway Modulation: Evidence from UPLC– MS/MS and Network Analysis
Source: Research Square preprint supplement (doi:10.21203/rs.3.rs-8011125/v1), 2025-11-13
Supplement: Supplementary file 1 [file 1f27855a8049b81d30dd82b5.xlsx]

## Sheet: Sheet1
序号	化合物谱峰（保留时间_质荷比）	质荷比	保留时间(min)	加合物形式	分子式	母离子得分	碎片得分	质量误差（ppm）	碎片质荷比	峰面积	化合物名称	归属
No.	Compound	m/z	Retention time (min)	Adducts	Formula	Score	Fragmentation Score	Mass Error (ppm)	Fragments	Peak Area	Ingredient_id	Source
1	0.83_162.0759m/z	162.076	0.832833	M+H-H2O	C6H13NO5	53.9	78.3	-1.05143	97.0291, 85.0293, 72.0455, 60.0457, 162.0758, 144.0654, 84.0453, 69.0347, 103.0395, 60.0821	137450	2-amino-2-deoxy-alpha-d-glucopyranose	地黄
2	0.83_132.0655m/z	132.066	0.832833	M+H	C5H9NO3	45.3	64.8	0.0324816	86.061, 68.0507, 74.0248, 132.0655, 84.0454, 87.0562, 88.0403	469605	L-hydroxyproline	鹿角胶
3	0.83_175.1188m/z	175.119	0.832833	M+H	C6H14N4O2	51.1	59.1	-0.976506	70.0663, 175.1188, 60.057, 116.0709, 130.0976	1.18152e+06	L-arginine	山药
4	0.85_148.0602m/z	148.06	0.850567	M+H	C5H9NO4	51.6	61.2	-1.55559	84.0453, 102.0556, 130.0499, 56.0509	207953	Dl-glutamic acid	山茱萸, 山药
5	0.85_198.0971m/z	198.097	0.850567	M+NH4	C6H12O6	40.6	11.2	-0.402473	70.0664, 99.0559, 198.0754, 85.0294, 84.0818, 183.1125, 140.0339, 112.0397, 126.055, 69.0347	513878	D-(+)-mannose	枸杞子, 山药
6	0.85_117.0793n	118.087	0.850567	M+H, 2M+H	C5H11NO2	40.2	6.83	2.8805	118.0866	1.22957e+07	L-valine	龟板胶
7	0.87_162.0526n	325.113	0.868	M+H-H2O, M+H, M+NH4, 2M+H	C6H10O5	43	19.2	-1.18373	85.0293, 69.0347, 61.0298, 97.029, 127.0391, 145.0493, 73.0296, 91.0398, 57.0349, 55.0193	6.48035e+06	Dimethyl d -malate	山茱萸
8	0.90_116.0711m/z	116.071	0.902117	M+H	C5H9NO2	53.2	76	3.8941	70.0663, 116.0709	2.9525e+06	Proline	山茱萸, 山药
9	1.13_684.2554m/z	684.255	1.13337	M+NH4	C24H42O21	49.6	51.5	-0.498296	85.0294, 61.0298, 97.0291, 127.0391, 69.0347, 91.0398, 145.0494, 163.0599, 73.0295, 70.0663	4.24241e+06	Stachyose	地黄
10	1.27_522.2029m/z	522.203	1.26602	M+NH4	C18H32O16	50.9	56.6	0.156723	85.0294, 69.0347, 127.0391, 97.0292, 145.0494, 61.0298, 57.0349, 55.0193, 73.0296, 325.1125	2.70942e+06	Gentianose	地黄
11	1.57_166.0862m/z	166.086	1.5698	M+H	C9H11NO2	45.3	29.4	-0.102896	166.086, 74.0248, 137.0597, 121.065, 96.0452, 149.0595, 56.0509, 166.0502, 91.055, 102.0557	89536.7	Phenylalanine	枸杞子, 地黄
12	1.62_338.0846n	356.118	1.62262	M+H, M+NH4, M+Na, M+K	C12H18O11	43.2	20.4	-0.900793	95.0135, 85.0294, 141.018, 177.0391, 69.0347, 129.0182, 57.0349, 97.0291, 113.0238	779656	2-o-alpha-d-glucopyranosyl -l-ascorbic acid	枸杞子
13	1.62_176.0321n	177.039	1.62262	M+H-2H2O, M+H	C6H8O6	44.1	22.7	-0.209017	95.0135, 85.0294, 57.0349, 141.018, 129.0184, 113.0238, 97.0292, 69.0347, 111.0083, 70.0664	308374	Ascorbicacid	枸杞子
14	1.65_124.0396m/z	124.04	1.65182	M+H	C6H5NO2	45.4	31.2	2.41967	124.0395, 80.0505, 123.0555, 108.0449, 96.0452	267083	Nicotinic acid	枸杞子
15	2.01_129.0428n	130.05	2.01093	M+H, M+Na, 2M+H	C5H7NO3	42.5	19.4	1.40489	110.0354, 112.0398, 150.0911, 140.0341, 59.0743, 84.9606, 67.0554, 105.0706, 126.0551, 56.9437	2.09746e+06	Dl-pyroglutamic acid	枸杞子, 地黄
16	2.04_182.0812m/z	182.081	2.03883	M+H	C9H11NO3	46.2	33.6	0.356289	96.0452, 87.045, 182.0809, 105.0341, 136.0757, 91.0551, 123.0443, 119.0494, 165.0545, 95.0499	215247	Dl-tyrosine	山药
17	2.18_158.0924m/z	158.092	2.18297	M+H-H2O	C6H13N3O3	43.7	21.7	-0.0469123	158.0923, 70.0663, 112.0874, 113.9641, 56.9436, 131.9742, 72.9383, 68.9983, 156.0846, 111.0081	119173	Cir	枸杞子
18	2.33_828.2749n	846.309	2.32877	M+NH4, M+Na	C30H52O26	45.4	35	0.227996	851.2615, 203.052, 527.1578, 308.1213, 648.6135, 233.6552, 190.1071, 134.5574, 118.7678, 104.5529	160700	Verbascose	地黄
19	2.73_120.0579n	121.065	2.72995	M+H, M+NH4	C8H8O	40.6	8.68	3.38004	137.0596, 111.0445, 84.9606, 81.0709, 95.0863, 136.0215, 91.0551, 65.0399, 90.9485, 83.0502	117533	Coumaran	山茱萸
20	2.79_132.1021m/z	132.102	2.78738	M+H	C6H13NO2	47.7	40.5	1.21594	86.0974, 84.0454, 72.9383, 69.0711	1.64971e+06	Dl-isoleucine	山茱萸, 山药
21	3.11_362.1210n	380.155	3.10683	M+NH4, M+Na, M+K	C15H22O10	44.1	26.5	-0.84728	70.0663, 385.1091, 81.0707, 383.3297, 100.0763, 81.034, 84.0817, 93.0706, 67.0554, 204.241	241531	Catalpol	地黄
22	3.69_268.1038m/z	268.104	3.68688	M+H	C10H13N5O4	46.5	35.7	-0.700677	136.0617	1.85891e+06	Adenine nucleoside	地黄, 山药, 鹿角
23	4.30_450.1375n	473.127	4.30478	M+NH4, M+Na, M+K	C18H26O13	42	14.9	0.344665	109.029, 127.0389, 81.0347, 70.0663, 61.0298, 153.0182	756756	5-[(6-o-alpha-d-glucopyranosyl -alpha-d-glucopyranosyl)oxymethyl] -2-furancarbaldehyde	地黄
24	4.53_362.0848n	345.081	4.53027	M+H-2H2O, M+H-H2O, M+NH4, M+Na	C14H18O11	48	44.3	-0.377655	70.0663, 385.0747, 81.0708, 84.0454, 55.0556, 107.0495, 86.0611	1.4559e+06	7-o-galloyl-sedoheptulose	山茱萸
25	4.70_288.0843n	311.073	4.69703	M+H, M+NH4, M+Na, M+K	C12H16O8	41.6	12.4	-0.866351	109.0292, 127.0393, 70.0663, 84.9607, 81.0345, 86.0976, 56.9661, 53.04, 97.0289, 55.0557	1.3813e+06	5-(alpha-d-glucopyranosyloxymethyl) -2-furancarboxaldehyde	地黄
26	4.81_148.0525n	166.086	4.81065	M+H, M+NH4	C9H8O2	49.8	50	0.191677	120.0811, 103.0547	1.37784e+06	Cinnamic acid	枸杞子
27	4.84_126.0320n	127.039	4.83942	M+H-H2O, M+H	C6H6O3	46.3	34.2	2.06869	109.0289, 81.0345, 53.04, 127.0392	9.17672e+06	5-hydroxymethylfurfural	地黄, 山茱萸
28	5.42_362.1213n	385.111	5.41775	M+NH4, M+Na	C15H22O10	40.6	9.55	-0.0197165	70.0664, 385.1114, 81.0709, 84.0818, 72.082, 86.0611, 383.3293, 55.0557, 69.0712	79057.6	(2s,3r,4r,5s,6r) -2-[[(1s,4as,5r,7ar) -4a,5-dihydroxy -7-(hydroxymethyl) -5,7a-dihydro-1h-cyclopenta[c]pyran -1-yl]oxy]-6-(hydroxymethyl)oxane -3,4,5-triol	地黄
29	5.98_686.2270n	704.261	5.97915	M+NH4, M+Na, M+K	C27H42O20	41.4	9.65	0.153808	709.2031, 656.697, 70.0666, 91.5837, 365.1014, 262.3223, 140.2055, 339.5525, 143.2599, 56.2989	826027	Rhmannioside d	地黄
30	6.07_196.0969m/z	196.097	6.06768	M+NH4	C10H10O3	43.4	21.9	0.506688	96.0451, 196.0965, 59.0505, 105.0342, 55.9358, 84.9606, 105.9354, 133.0284, 55.0557	122792	(e-p-hydroxy-cinnamic acid	枸杞子
31	6.13_374.1212n	392.155	6.12712	M+NH4, M+Na	C16H22O10	48.9	50.9	-0.218901	70.0664, 397.1103, 86.0976, 84.0818, 55.0556, 84.0453, 81.0347, 85.0296, 86.061, 120.081	64362.4	Swertiamarin	山茱萸
32	6.19_524.1744n	542.208	6.18628	M+H-2H2O, M+NH4, M+Na, M+K	C21H32O15	43.2	19.2	0.440565	147.0439, 70.0663, 119.0492, 72.082, 86.0611, 69.0346, 86.0976, 91.0551, 81.0711, 81.0343	665531	Rehmannioside a	地黄
33	6.54_143.0339m/z	143.034	6.54187	M+H	C6H6O4	46.4	33.6	0.295726	143.0337, 99.0447, 69.0347, 84.9607	300713	5-hydroxymethyl -2-furancarboxylic acid	地黄
34	6.54_170.0811m/z	170.081	6.54187	M+NH4	C8H8O3	41.4	9.46	-0.35544	70.0663, 169.097, 170.0811, 82.0662, 81.0709, 72.0455, 124.0759, 67.0555, 152.0704, 79.0553	68480.4	4-methoxy -1,2-benzodioxole	山茱萸
35	6.63_112.0530n	113.06	6.63078	M+H, M+Na	C6H8O2	45.2	31.7	4.92561	84.9606, 102.9708, 91.055, 105.0038, 90.9485, 79.0553, 72.9382, 107.0498, 56.9662	1.22657e+06	Dehydromevalonic lactone	山茱萸
36	6.96_166.0630n	167.07	6.95707	M+H-H2O, M+H	C9H10O3	45.2	28.4	0.00270408	84.9607, 149.0596, 93.0707, 121.065, 91.0551, 167.0701, 120.081, 81.0709, 95.0499, 70.0663	92541.8	Vanirom	山茱萸
37	7.54_369.2019m/z	369.202	7.54463	M+Na	C21H30O4	39.5	9.63	-4.94974	70.0663, 91.0583, 73.048, 72.082, 285.159, 190.1225, 285.0092, 268.9772, 84.0818, 150.0913	259001	Corticosterone	地黄
38	8.35_147.0440m/z	147.044	8.34847	M+H	C9H6O2	44.8	26.2	-0.121682	84.9607, 91.0551, 119.0494, 147.0439, 146.0601, 65.0399, 102.9709, 121.0287, 99.0448	87051.4	Coumarin	山茱萸
39	8.53_531.3180m/z	531.318	8.52827	M+H	C28H42N4O6	49.7	54.9	0.636023	123.0443, 222.1122, 70.0663, 165.0546, 293.1852, 531.3199, 100.0765, 86.061, 84.0818, 112.1129	134216	Kukoamine b	枸杞子
40	8.77_404.1318n	405.139	8.76803	M+H, M+NH4, M+Na, M+K	C17H24O11	47.7	44.3	-0.131446	70.0663, 91.0583, 86.061, 443.0964, 73.048, 86.0973, 167.0552, 84.0818, 72.082, 84.0455	829842	7,8-dehydropenstemoside	山茱萸
41	8.80_243.0862m/z	243.086	8.79865	M+H	C11H14O6	49.3	48.7	-0.396541	95.05, 151.0389, 86.0974, 84.0454, 125.0236, 123.0443, 167.0336, 197.1278, 67.0556, 97.0291	106873	Methyl (1r,4ar,5r,7as) -1,4a,5-trihydroxy -7-methyl-5,7a-dihydro-1h-cyclopenta[c]pyran -4-carboxylate	山茱萸
42	9.10_205.0972m/z	205.097	9.09533	M+H	C11H12N2O2	43.8	20.1	0.264885	120.081, 91.055, 149.0231, 132.0807, 103.0548, 114.0427, 205.0968, 131.049, 177.1021	440521	Tryptophan	枸杞子
43	9.48_506.1869m/z	506.187	9.48188	M+NH4	C21H28O13	44.2	28.3	0.263088	147.0438, 70.0663, 85.0294, 119.0496, 165.0545, 97.0291, 69.0347, 86.061, 86.0973, 61.0296	140153	Cistanoside f	地黄
44	9.96_406.1471n	424.181	9.95995	M+H-2H2O, M+H-H2O, M+H, M+NH4, M+Na, M+K	C17H26O11	49	47.6	-0.936983	91.0589, 73.048, 149.0598, 93.0708, 86.0971, 121.0651, 103.0549, 163.0386, 268.979, 70.0662	3.15085e+07	Methyl 3 -hydroxy-1-methyl-8-[3,4,5-trihydroxy -6-(hydroxymethyl)oxan -2-yl]oxy-1,3,4,4a,8,8a -hexahydropyrano[3,4 -c]pyran-5-carboxylate	山茱萸
45	9.96_226.0839n	227.091	9.95995	M+H-2H2O, M+H-H2O, M+H, 2M+H	C11H14O5	51.6	61.5	-1.15411	119.0859, 159.044, 91.0551, 191.069, 133.0285, 130.1227, 103.055, 105.0705, 95.0864, 112.1126	7.6687e+06	Geniposide deglycosylation	地黄
46	9.96_155.0337m/z	155.034	9.95995	M+H	C7H6O4	42.2	16.2	-1.09909	155.0338, 139.0388, 97.0291, 70.0663, 112.0398, 123.0079, 95.0135, 69.0347, 95.0499, 82.0661	77272.1	3,4-dihydroxybenzoic acid	山茱萸
47	9.99_354.0946n	355.102	9.98988	M+H, M+Na	C16H18O9	50.3	58.6	-1.3186	377.0838, 70.0664, 81.0708, 86.0974, 246.2897, 84.0455, 56.0508, 81.0346, 340.9459, 87.9198	852934	Chlorogenic acid	菟丝子
48	10.02_265.1431m/z	265.143	10.0151	M+H	C15H20O4	43.6	25	-1.35855	132.0807, 119.0858, 264.1586, 105.0704, 91.0551, 67.0555, 150.0911, 69.0711, 95.0498, 135.0805	80629.2	Tauremisin	山茱萸
49	10.21_376.1368n	394.171	10.2061	M+H-2H2O, M+H-H2O, M+H, M+NH4, M+Na	C16H24O10	48.5	49.6	-0.425331	109.0653, 69.0347, 81.0709, 84.9605, 105.0704, 70.0663, 85.0294, 179.0701, 127.039, 93.0706	758094	8-epiloganic acid	地黄
50	10.85_402.1526n	420.186	10.8489	M+NH4, M+Na	C18H26O10	40.8	12.2	0.100584	70.0663, 91.0552, 86.0974, 72.0821, 85.0293, 97.0292, 86.0611, 84.0817, 69.0347, 57.0349	63473.8	Acetylcatalpol	地黄
51	11.12_211.0845n	194.081	11.116	M+H-H2O, M+Na	C10H13NO4	40.8	9.97	0.147375	57.0713, 234.0734, 84.9607, 81.0708, 56.9661, 218.0808, 91.0551, 105.0705, 188.0701, 69.071	61031.9	N-(3,4,5-trimethoxyphenyl)formamide	川牛膝
52	11.39_626.1481n	627.155	11.3869	M+H, M+Na	C27H30O17	38.4	0.458	-0.305002	70.0664, 303.0501, 86.0611, 86.0974, 84.0818, 68.0506, 84.0452	206702	Quercetin -3-o-galactoside -7-o-glucoside	菟丝子
53	12.37_194.0579n	195.065	12.3694	M+H-H2O, M+H	C10H10O4	47.9	42.8	-0.0644326	149.0596, 177.0542, 91.0551, 84.9607, 103.0549, 121.0651, 93.0707, 95.0499, 105.0703, 111.0809	194896	Cis-ferulic acid	地黄, 川牛膝
54	12.46_358.1259n	359.133	12.4558	M+H, M+Na, M+K, 2M+H	C16H22O9	49.9	52.9	-1.47649	70.0664, 86.0974, 120.0808, 397.0902, 86.0611, 84.0818, 72.0816, 91.5838, 151.0395, 127.0871	3.09957e+06	Sweroside	山茱萸
55	13.34_501.1974m/z	501.197	13.3403	M+H-H2O	C23H34O13	45.6	39.2	1.46726	120.0811, 70.0663, 501.1976	337703	Jioglutoside b	地黄
56	13.42_228.0994n	229.107	13.4216	M+H-2H2O, M+H-H2O, M+H	C11H16O5	52	63.3	-1.69676	70.0663, 109.0653, 179.0701, 81.0709, 105.0704, 151.0751, 114.0917, 72.0456, 211.0961, 79.0554	7.3855e+06	8-epiloganin deglycosylation	山茱萸
57	13.42_196.0733n	179.07	13.4216	M+H-2H2O, M+H-H2O, M+H	C10H12O4	51.3	60	-1.47132	109.0655, 81.071, 151.0752, 105.0707, 95.0864, 133.0653, 123.0807, 79.0553, 179.0697, 137.0596	3.29034e+06	Sweroside aglycone	山茱萸
58	13.42_150.0679n	151.075	13.4216	M+H-2H2O, M+H-H2O, M+H	C9H10O2	43.1	18.7	-1.36756	81.0709, 84.9606, 151.0752, 95.0863, 105.0704, 79.0553, 67.0555, 123.0807, 109.0654, 55.0193	498838	2-phenylpropionic acid	山茱萸
59	13.45_390.1519n	408.186	13.4477	M+H-H2O, M+H, M+NH4, M+K	C17H26O10	48.9	47.9	-1.68289	109.0653, 81.0709, 179.07, 149.0232, 105.0704, 151.0753, 133.0649, 229.1066, 55.0557, 123.0807	1.15916e+07	7-epi-loganin	山茱萸
60	13.45_122.0733n	123.081	13.4477	M+H-H2O, M+H	C8H10O	41.9	17.8	1.31086	123.0807, 79.0553, 111.0238, 67.0555, 96.0452, 95.0865, 123.0554, 104.0711, 108.0576, 56.051	88658.3	2-phenylethanol	山茱萸
61	13.82_192.0423n	193.05	13.8231	M+H, M+Na	C10H8O4	51.1	57.2	-0.00908693	70.0662, 95.0501, 134.06, 170.0593, 55.0557, 84.9606, 91.0551, 198.0557, 115.0548, 53.04	313095	Isoscopoletin	枸杞子
62	14.90_800.2729n	818.307	14.902	M+NH4, M+Na	C36H48O20	41	19.2	-1.24007	70.0663, 86.061, 145.0283, 177.0546, 84.0818, 127.0869, 143.0812, 68.0507, 86.0974, 171.0763	162709	Jionoside a1	地黄
63	15.53_388.1366n	411.126	15.5298	M+NH4, M+Na	C17H24O10	43.4	23.9	-0.972807	411.1256, 70.0664, 86.0971, 110.073, 179.0314, 120.0806, 72.082, 71.0506, 345.0486, 93.8682	131831	Geniposide	地黄
64	15.68_320.0912m/z	320.091	15.6795	M-e	C19H14NO4+	41.4	12.9	-1.7943	320.0911, 292.0959, 277.0726, 262.0856, 290.0803, 318.0753, 93.0706, 249.0775, 79.0553, 67.0555	513076	Coptisine	枸杞子
65	15.98_596.1371n	597.144	15.9789	M+H, M+Na, M+K	C26H28O16	49.3	51.1	-1.02636	70.0663, 86.0609, 635.0992, 84.0816, 86.0974, 147.0435, 68.0507, 120.0811, 110.0717, 129.1024	1.65692e+06	Quercetin 3 -apiosyl-(1->2)-galactoside	菟丝子
66	16.04_336.1223m/z	336.122	16.0389	M-e	C20H18NO4+	45.9	37.1	-2.20047	320.0912, 336.1225, 292.0961, 120.0811, 264.1014	62726.8	Epiberberine	枸杞子
67	16.16_388.2092n	411.198	16.1583	M+NH4, M+Na	C19H32O8	42.5	19.4	-1.35837	411.1986, 70.0698, 203.0529, 86.0975, 84.0816	111385	Rehmaionoside c	地黄
68	16.19_520.1944n	538.228	16.1882	M+NH4, M+Na	C26H32O11	39.1	2.98	-0.151498	70.0665, 86.0973, 543.1859, 84.0819, 86.0611, 264.3115, 110.0724, 67.572, 147.7994, 123.0398	153544	(+)-pinoresinol 4 -o-beta-d-glucopyranoside	菟丝子
69	16.31_624.2049n	642.239	16.3083	M+NH4, M+Na	C29H36O15	42.5	18	-0.881074	70.0664, 86.0611, 647.1919, 84.0817, 86.0973, 72.0819, 110.0721, 84.0455, 147.0438, 127.0866	291792	Isoacteoside	地黄
70	16.61_338.1381m/z	338.138	16.6075	M-e	C20H20NO4+	46.6	39.4	-1.95346	338.1379, 280.0957, 322.1068, 294.1119, 279.0884, 323.1132, 308.0906, 307.0834, 306.1115, 145.0283	415811	Columbamine	枸杞子
71	16.88_837.2778m/z	837.278	16.878	M+Na	C37H50O20	38	0.0621	-1.19411	70.0663, 86.061, 143.0815, 837.2729, 86.0974, 84.0818, 68.0507, 127.0871, 171.0762, 72.0819	65097.3	Wiedemannioside c	地黄
72	17.15_464.0949n	465.102	17.1467	M+H, M+Na, M+K	C21H20O12	50.8	57	-1.26193	487.0844, 185.0419, 325.0311, 70.0663, 86.0975, 324.0231	1.06703e+07	Hyperoside	菟丝子
73	17.15_390.2246n	413.214	17.1467	M+H-2H2O, M+H-H2O, M+NH4, M+Na, M+K	C19H34O8	41.7	18.1	-2.00761	109.1018, 69.0711, 95.0863, 67.0555, 81.071, 91.0589, 93.0705, 69.0346, 105.0703, 107.086	620280	Rehmaionoside a	地黄
74	17.33_519.2952m/z	519.295	17.3252	M+H-H2O	C29H44O9	46.7	40.9	-0.129909	109.0653, 301.1792, 519.2948, 86.0974, 283.1688, 70.0663, 86.061, 155.0702, 181.0857, 81.0709	160268	Sengosterone	川牛膝
75	17.39_610.1526n	611.16	17.3859	M+H, M+Na	C27H30O16	50	53.8	-1.24094	70.0664, 633.1404, 86.0611, 72.0819, 86.0975, 331.0991, 84.0817, 110.072, 120.0808, 68.0508	1.02154e+06	Quercetin 3 -o-rhamnopyranosyl	枸杞子
76	17.50_336.1224m/z	336.122	17.5037	M-e	C20H18NO4+	48.1	46.7	-2.14006	336.1225, 320.0913, 292.0962, 278.0808, 321.0967, 304.0963, 306.0752, 318.0761, 307.0811	952409	Berberine	枸杞子
77	17.77_352.1538m/z	352.154	17.772	M-e	C21H22NO4+	44.9	30.3	-1.71918	352.1541, 337.1278, 321.0996, 294.1114, 322.1063, 336.1227, 293.1043, 308.1277, 292.0963, 320.1277	1.02748e+06	Palmatine	枸杞子
78	18.52_448.0998n	449.107	18.5229	M+H, M+Na	C21H20O11	53	73.4	-1.76058	471.0836, 147.0393, 70.0663, 119.0495, 86.0973, 185.0418, 309.0339, 91.584, 84.0819, 84.0452	259536	Kaempferol 3 -o-bata-d-galactopyranoside	菟丝子
79	18.58_332.1827n	355.172	18.5814	M+H, M+NH4, M+Na, M+K	C16H28O7	42.1	19.2	-2.51722	153.1273, 81.0709, 71.0503, 93.0707, 107.086, 135.1168, 73.0659, 91.5846, 79.0553, 69.0711	703446	Angelicoidenol 2 -o-beta-d-glucopyranoside	枸杞子
80	18.61_152.1198n	153.127	18.6102	M+H-H2O, M+H	C10H16O	44.7	29.2	-1.85232	81.0709, 84.9607, 93.0707, 107.0862, 71.0504, 79.0553, 88.9535, 135.1168, 111.0237, 70.0664	157842	Pulegone	山茱萸
81	18.61_380.1099n	381.117	18.6102	M+H-H2O, M+H	C18H20O9	49.1	54.1	-2.23455	141.0545, 109.0289, 153.0181, 211.0963, 127.0391, 53.04, 81.0346, 81.0712, 111.081, 95.0499	464501	Cornuside deglycosylation	山茱萸
82	18.61_520.3028n	503.299	18.6102	M+H-2H2O, M+H-H2O, M+H, M+Na, 2M+H	C29H44O8	52.3	66.2	-1.62885	301.1793, 503.2995, 111.0809, 283.1688, 93.0707, 55.0556, 109.0653, 81.0709, 145.101, 105.0704	1.01971e+07	Precyasterone	川牛膝
83	18.61_542.1627n	560.197	18.6102	M+H, M+NH4, M+Na, M+K	C24H30O14	43.3	20.5	-1.59455	141.0544, 109.0288, 153.018, 211.096, 111.0811, 127.0393, 81.0346, 70.0664, 81.0711, 179.0703	4.75414e+06	Cornuside	山茱萸
84	19.14_478.1109n	479.118	19.1396	M+H, M+Na, M+K	C22H22O12	46.4	35.4	-0.420366	501.0997, 185.0418, 338.0403, 70.0663, 86.0973, 84.0817	809482	Isorhamnetin 3 -galactoside	菟丝子
85	19.14_317.0652m/z	317.065	19.1396	M+H	C16H12O7	45.7	33.8	-1.34506	317.0652, 153.018, 229.0493, 302.0418, 93.0343, 92.0265, 285.0385, 274.0453, 228.041, 246.0511	79539.5	Isorhamnetin	菟丝子
86	19.23_313.1309n	314.138	19.23	M+H, M+Na	C18H19NO4	45.7	33.6	-1.73699	336.123, 320.0901, 278.0809, 292.097, 321.0966, 119.0859, 93.0704, 91.0551, 81.0708, 70.0661	429491	Lyciumide a	枸杞子
87	19.74_340.1307n	341.138	19.7379	M+H-H2O, M+H	C20H20O5	39.4	3.68	-1.03266	137.0597, 227.0701, 187.075, 291.1009, 248.0829, 211.0753, 323.1284, 203.085, 255.0633, 271.0951	67227.3	Burchellin	山药
88	19.89_264.1358n	247.133	19.886	M+H-2H2O, M+H-H2O, M+Na	C15H20O4	50.4	57.3	-1.18017	187.1116, 91.0552, 119.086, 107.0862, 105.0704, 135.0806, 201.1269, 173.1322, 93.0708, 247.1329	94880.3	Abscisic acid	山药
89	20.09_208.1462n	209.153	20.0946	M+H-2H2O, M+H-H2O, M+H	C13H20O2	48.4	47.5	-0.863891	84.9608, 69.071, 125.0963, 191.1466, 69.0348, 91.0551, 107.0859, 55.0556, 109.0654, 67.0555	60299.6	3-hydroxy-β-ionone	枸杞子
90	20.16_652.2360n	670.27	20.1552	M+NH4, M+Na	C31H40O15	46.7	40.1	-1.06338	675.2255, 70.0664, 86.0973, 86.061, 110.0719, 529.1656, 84.0816, 72.082, 120.0814, 262.5298	210938	Martynoside	地黄
91	20.36_477.3210m/z	477.321	20.364	M+H-H2O	C28H46O7	52.3	68.9	-0.159413	69.0711, 95.0865, 301.1808, 55.0556, 83.0864, 81.0709, 93.0706, 113.0964, 86.0974, 249.1487	106387	Makisterone b	川牛膝
92	21.20_610.1319n	611.139	21.1953	M+H, M+Na	C30H26O14	42.6	16.6	-0.641308	70.0681, 86.0969, 84.0817, 572.1124, 163.0387, 120.0812, 441.7666, 222.3727, 159.0431, 170.2813	114067	Kaempherol 3 -(6-caffeoylglucoside)	菟丝子
93	21.23_303.0495m/z	303.049	21.2259	M+H	C15H10O7	50.9	59.2	-1.46833	303.0495, 153.0181, 137.0234, 229.0491, 201.0543, 68.9983, 257.0444, 165.0179, 121.0286	197640	Quercetin	川牛膝
94	21.97_508.3398n	509.347	21.9696	M+H-2H2O, M+H-H2O, M+H, M+Na	C29H48O7	50.3	57	-0.369276	55.0557, 83.0865, 473.325, 301.1798, 81.0709, 97.1018, 93.0707, 105.0705, 79.0553, 69.0711	386891	Amarasterone a2	川牛膝
95	22.68_664.2001n	687.189	22.6826	M+NH4, M+Na	C31H36O16	38.3	13.1	-0.412964	687.1934, 70.0663, 86.0974, 317.0833, 84.0818, 110.0716, 120.0808, 136.0757, 84.0452, 541.2292	77871.2	Cuscutoside b	菟丝子
96	23.60_219.0650m/z	219.065	23.5995	M+H	C12H10O4	51.8	61.2	-0.749013	219.0649, 187.0388, 131.0492, 135.0803, 176.0467, 105.0704, 148.0516, 191.0697, 91.055, 163.075	141564	6-ethyl-2,5-dihydroxy -1,4-naphthoquinone	山茱萸
97	24.34_504.3086n	487.305	24.3405	M+H-H2O, M+Na	C29H44O7	41	10.6	-0.222357	527.296, 70.0663, 426.3453, 86.0978, 91.5835, 405.2936, 129.1137, 292.2966, 120.0813, 90.7535	158509	Capitasterone	川牛膝
98	25.11_645.2918m/z	645.292	25.1106	M+Na	C38H42N2O6	38	0	-2.79992	645.2885, 70.0664, 166.0863, 86.0975, 136.0758, 120.0811, 297.1212, 337.1155, 172.0387, 285.1198	68664.6	Isotetrandrine	山茱萸
99	26.69_285.0755m/z	285.075	26.6943	M+H	C16H12O5	49	49.2	-1.00969	270.0518, 285.0753, 284.2941, 57.0713, 98.985, 63.0009	70789	Physcion	枸杞子
100	27.20_265.1907m/z	265.191	27.1985	M+H	C15H24N2O2	48.2	48	-1.29943	123.092, 265.1909, 247.1801, 122.0842, 135.0917, 149.1074, 55.0558, 219.1859, 79.0551, 67.0556	83338.4	Sophoranol	菟丝子
101	27.41_278.2243n	279.232	27.4066	M+H-H2O, M+H	C18H30O2	40.5	6.22	-1.09771	149.0233, 219.0568, 279.0933, 67.0555, 81.0709, 95.0863, 201.0463, 93.0707, 79.0553, 55.0557	181142	(z,z,z)-9,12,15-octadecatrienoic acid	山茱萸
102	28.18_290.2686m/z	290.269	28.1825	M+NH4	C16H32O3	40.6	7.61	-1.26073	88.0766, 290.2681, 57.0713, 56.0509, 74.061, 242.2467, 118.0868, 85.1021, 71.0867, 67.0553	104218	(r)-2-hydroxytetradecanoic acid ethyl ester	山茱萸
103	28.99_290.1746m/z	290.175	28.9893	M+H	C17H23NO3	39.6	2.87	-1.69917	57.0713, 88.0765, 55.0557, 69.0711, 79.0552, 81.0709, 91.0551, 67.0556, 93.0709, 105.0703	250234	Atropine	枸杞子
104	28.99_244.1097n	245.117	28.9893	M+H, M+Na	C15H16O3	40.7	6.84	-1.10426	57.0716, 55.0557, 267.0988, 67.0555, 81.071, 95.0863, 69.0712, 83.0868, 91.0551, 79.0555	1.76908e+06	3-[2-(3-hydroxyphenyl)ethyl] -5-methoxyphenol	山药
105	30.01_229.0858m/z	229.086	30.0055	M+H	C14H12O3	43.9	22.8	-0.691727	229.0857, 131.0493, 175.0388, 187.0387, 159.044, 95.0863, 55.0558, 147.0439, 67.0557, 214.0622	278224	10,11-dihydro-dibenz[b,f]oxepin -2,4-diol	山药
106	31.89_353.1017m/z	353.102	31.8914	M+H-H2O	C20H18O7	50.4	57.8	-0.676537	135.044, 149.023, 79.0552, 353.1023, 81.073, 67.0555	195306	Neo-sesamin	菟丝子
107	32.69_195.0652m/z	195.065	32.6915	M+H-H2O	C10H12O5	44.5	26.4	0.226902	163.0388, 55.9358, 105.9354, 104.9639, 84.9606, 90.9486, 123.9454, 72.9383, 150.9689, 167.9715	64548.5	Swertiamarin deglycosylation	山茱萸
108	32.78_293.2094m/z	293.209	32.7815	M+Na	C16H30O3	45.3	31.7	2.51428	55.0562, 67.0555, 81.0709, 93.0706, 79.0553, 95.0502, 57.0714, 69.0713, 91.0552, 95.0864	388515	11-hexadecanoic acid	龟板
109	33.05_330.3364m/z	330.336	33.0453	M+NH4	C20H40O2	45.3	30.1	-0.798865	330.3363, 98.9849, 57.0713, 70.0663, 88.0766, 91.055, 71.0868, 106.0869, 102.092, 55.0556	849923	Arachidic acid	地黄
110	34.59_294.1255n	295.133	34.5913	M+H, M+Na	C19H18O3	41.8	11.6	-0.321384	57.0713, 88.0767, 91.055, 317.1147, 93.0708, 67.0555, 133.1008, 84.9608, 69.0712, 95.086	89674	1,7-bis(4-hydroxyphenyl)hepta -4,6-dien-3-one	山药
111	34.77_281.2474m/z	281.247	34.7707	M+H	C18H32O2	45.8	32.3	-0.536141	55.0557, 69.0711, 81.0709, 67.0555, 95.0863, 149.0232, 83.0865, 57.0713, 93.0707, 109.1017	150760	11,14-octadecadienoic acid	山茱萸
112	34.83_358.3678m/z	358.368	34.8293	M+NH4	C22H44O2	46.3	35.1	-0.543375	358.3675, 70.0664, 88.0766, 57.0713, 106.0869, 71.0867, 102.0921	929539	Docosanoic acid	地黄
113	36.69_328.2613n	351.25	36.6875	M+H-H2O, M+H, M+NH4, M+Na	C19H36O4	45	30.4	-0.306727	55.0557, 69.0712, 60.0821, 57.0714, 81.071, 67.0555, 311.2581, 95.0863, 83.0866, 79.0551	117109	Linoelaidic acid	地黄, 山茱萸
114	36.81_262.2295n	280.263	36.8073	M+H-H2O, M+H, M+NH4	C18H30O	42.1	14.8	-0.818911	81.071, 245.227, 91.055, 95.0863, 67.0555, 93.0706, 57.0713, 79.0553, 70.0664, 55.0557	258004	Farnesylacetone	枸杞子
115	38.03_330.2766n	353.266	38.0344	M+H-H2O, M+H, M+NH4, M+Na	C19H38O4	43.1	20.3	-1.32357	57.0713, 313.2733, 71.0867, 57.0349, 95.0864, 81.0709, 67.0555, 55.0557, 85.1022, 69.0711	9.45092e+06	2-monopalmitin	山茱萸
116	38.48_473.3618m/z	473.362	38.4808	M+H	C30H48O4	37.4	0.77	-1.63114	88.1132, 91.5797, 57.0714, 277.0042, 55.0557, 111.0443, 83.0502, 80.9489, 101.0603, 348.3476	387997	Maslinic acid	地黄, 山茱萸
117	43.44_426.3857n	449.375	43.4356	M+H-H2O, M+H, M+Na	C30H50O	41.9	17	-1.2065	95.0863, 81.0709, 69.0711, 107.0861, 67.0555, 109.1019, 93.0708, 80.9489, 62.9832, 55.0558	158573	24-methylidenelophenol	枸杞子
118	48.54_919.0810m/z	919.081	48.5426	M+H-2H2O	C41H30O27	37.2	0	-2.72528	919.0825, 918.878, 911.6246, 853.5803, 795.5418, 737.4988, 918.6706, 915.8793, 679.4559, 915.4738	5.60128e+06	Isoterchebin	山茱萸
119	51.57_369.3513m/z	369.351	51.5738	M+H-H2O	C27H46O	40.4	8.59	-0.774563	91.0583, 73.048, 81.0709, 285.0095, 268.9781, 95.0862, 67.0555, 147.1165, 109.1018, 105.0705	273859	Cholesterol	枸杞子
120	51.92_299.2941m/z	299.294	51.9229	M+H	C19H38O2	39.2	1.23	-1.10259	57.0712, 55.0557, 84.9609, 69.0712, 91.0586, 299.0618, 73.0479, 81.071, 71.0865, 67.0557	97242.3	Nonadecylic acid	地黄

## Sheet: Sheet2
No.	Compound	m/z	Retention time (min)	Adducts	Formula	Score	Fragmentation Score	Mass Error (ppm)	Fragments	Peak Area	Ingredient_id
1	0.83_162.0759m/z	162.076	0.832833	M+H-H2O	C6H13NO5	53.9	78.3	-1.05143	97.0291, 85.0293, 72.0455, 60.0457, 162.0758, 144.0654, 84.0453, 69.0347, 103.0395, 60.0821	137450	2-amino-2-deoxy-alpha-d-glucopyranose
2	0.83_132.0655m/z	132.066	0.832833	M+H	C5H9NO3	45.3	64.8	0.0324816	86.061, 68.0507, 74.0248, 132.0655, 84.0454, 87.0562, 88.0403	469605	L-hydroxyproline
3	0.83_175.1188m/z	175.119	0.832833	M+H	C6H14N4O2	51.1	59.1	-0.976506	70.0663, 175.1188, 60.057, 116.0709, 130.0976	1.18152e+06	L-arginine
4	0.85_148.0602m/z	148.06	0.850567	M+H	C5H9NO4	51.6	61.2	-1.55559	84.0453, 102.0556, 130.0499, 56.0509	207953	Dl-glutamic acid
5	0.85_198.0971m/z	198.097	0.850567	M+NH4	C6H12O6	40.6	11.2	-0.402473	70.0664, 99.0559, 198.0754, 85.0294, 84.0818, 183.1125, 140.0339, 112.0397, 126.055, 69.0347	513878	D-(+)-mannose
6	0.85_117.0793n	118.087	0.850567	M+H, 2M+H	C5H11NO2	40.2	6.83	2.8805	118.0866	1.22957e+07	L-valine
7	0.87_162.0526n	325.113	0.868	M+H-H2O, M+H, M+NH4, 2M+H	C6H10O5	43	19.2	-1.18373	85.0293, 69.0347, 61.0298, 97.029, 127.0391, 145.0493, 73.0296, 91.0398, 57.0349, 55.0193	6.48035e+06	Dimethyl d -malate
8	0.90_116.0711m/z	116.071	0.902117	M+H	C5H9NO2	53.2	76	3.8941	70.0663, 116.0709	2.9525e+06	Proline
9	1.13_684.2554m/z	684.255	1.13337	M+NH4	C24H42O21	49.6	51.5	-0.498296	85.0294, 61.0298, 97.0291, 127.0391, 69.0347, 91.0398, 145.0494, 163.0599, 73.0295, 70.0663	4.24241e+06	Stachyose
10	1.27_522.2029m/z	522.203	1.26602	M+NH4	C18H32O16	50.9	56.6	0.156723	85.0294, 69.0347, 127.0391, 97.0292, 145.0494, 61.0298, 57.0349, 55.0193, 73.0296, 325.1125	2.70942e+06	Gentianose
11	1.57_166.0862m/z	166.086	1.5698	M+H	C9H11NO2	45.3	29.4	-0.102896	166.086, 74.0248, 137.0597, 121.065, 96.0452, 149.0595, 56.0509, 166.0502, 91.055, 102.0557	89536.7	Phenylalanine
12	1.62_338.0846n	356.118	1.62262	M+H, M+NH4, M+Na, M+K	C12H18O11	43.2	20.4	-0.900793	95.0135, 85.0294, 141.018, 177.0391, 69.0347, 129.0182, 57.0349, 97.0291, 113.0238	779656	2-o-alpha-d-glucopyranosyl -l-ascorbic acid
13	1.62_176.0321n	177.039	1.62262	M+H-2H2O, M+H	C6H8O6	44.1	22.7	-0.209017	95.0135, 85.0294, 57.0349, 141.018, 129.0184, 113.0238, 97.0292, 69.0347, 111.0083, 70.0664	308374	Ascorbicacid
14	1.65_124.0396m/z	124.04	1.65182	M+H	C6H5NO2	45.4	31.2	2.41967	124.0395, 80.0505, 123.0555, 108.0449, 96.0452	267083	Nicotinic acid
15	2.01_129.0428n	130.05	2.01093	M+H, M+Na, 2M+H	C5H7NO3	42.5	19.4	1.40489	110.0354, 112.0398, 150.0911, 140.0341, 59.0743, 84.9606, 67.0554, 105.0706, 126.0551, 56.9437	2.09746e+06	Dl-pyroglutamic acid
16	2.04_182.0812m/z	182.081	2.03883	M+H	C9H11NO3	46.2	33.6	0.356289	96.0452, 87.045, 182.0809, 105.0341, 136.0757, 91.0551, 123.0443, 119.0494, 165.0545, 95.0499	215247	Dl-tyrosine
17	2.18_158.0924m/z	158.092	2.18297	M+H-H2O	C6H13N3O3	43.7	21.7	-0.0469123	158.0923, 70.0663, 112.0874, 113.9641, 56.9436, 131.9742, 72.9383, 68.9983, 156.0846, 111.0081	119173	Cir
18	2.33_828.2749n	846.309	2.32877	M+NH4, M+Na	C30H52O26	45.4	35	0.227996	851.2615, 203.052, 527.1578, 308.1213, 648.6135, 233.6552, 190.1071, 134.5574, 118.7678, 104.5529	160700	Verbascose
19	2.73_120.0579n	121.065	2.72995	M+H, M+NH4	C8H8O	40.6	8.68	3.38004	137.0596, 111.0445, 84.9606, 81.0709, 95.0863, 136.0215, 91.0551, 65.0399, 90.9485, 83.0502	117533	Coumaran
20	2.79_132.1021m/z	132.102	2.78738	M+H	C6H13NO2	47.7	40.5	1.21594	86.0974, 84.0454, 72.9383, 69.0711	1.64971e+06	Dl-isoleucine
21	3.11_362.1210n	380.155	3.10683	M+NH4, M+Na, M+K	C15H22O10	44.1	26.5	-0.84728	70.0663, 385.1091, 81.0707, 383.3297, 100.0763, 81.034, 84.0817, 93.0706, 67.0554, 204.241	241531	Catalpol
22	3.69_268.1038m/z	268.104	3.68688	M+H	C10H13N5O4	46.5	35.7	-0.700677	136.0617	1.85891e+06	Adenine nucleoside
23	4.30_450.1375n	473.127	4.30478	M+NH4, M+Na, M+K	C18H26O13	42	14.9	0.344665	109.029, 127.0389, 81.0347, 70.0663, 61.0298, 153.0182	756756	5-[(6-o-alpha-d-glucopyranosyl -alpha-d-glucopyranosyl)oxymethyl] -2-furancarbaldehyde
24	4.53_362.0848n	345.081	4.53027	M+H-2H2O, M+H-H2O, M+NH4, M+Na	C14H18O11	48	44.3	-0.377655	70.0663, 385.0747, 81.0708, 84.0454, 55.0556, 107.0495, 86.0611	1.4559e+06	7-o-galloyl-sedoheptulose
25	4.70_288.0843n	311.073	4.69703	M+H, M+NH4, M+Na, M+K	C12H16O8	41.6	12.4	-0.866351	109.0292, 127.0393, 70.0663, 84.9607, 81.0345, 86.0976, 56.9661, 53.04, 97.0289, 55.0557	1.3813e+06	5-(alpha-d-glucopyranosyloxymethyl) -2-furancarboxaldehyde
26	4.81_148.0525n	166.086	4.81065	M+H, M+NH4	C9H8O2	49.8	50	0.191677	120.0811, 103.0547	1.37784e+06	Cinnamic acid
27	4.84_126.0320n	127.039	4.83942	M+H-H2O, M+H	C6H6O3	46.3	34.2	2.06869	109.0289, 81.0345, 53.04, 127.0392	9.17672e+06	5-hydroxymethylfurfural
28	5.42_362.1213n	385.111	5.41775	M+NH4, M+Na	C15H22O10	40.6	9.55	-0.0197165	70.0664, 385.1114, 81.0709, 84.0818, 72.082, 86.0611, 383.3293, 55.0557, 69.0712	79057.6	(2s,3r,4r,5s,6r) -2-[[(1s,4as,5r,7ar) -4a,5-dihydroxy -7-(hydroxymethyl) -5,7a-dihydro-1h-cyclopenta[c]pyran -1-yl]oxy]-6-(hydroxymethyl)oxane -3,4,5-triol
29	5.98_686.2270n	704.261	5.97915	M+NH4, M+Na, M+K	C27H42O20	41.4	9.65	0.153808	709.2031, 656.697, 70.0666, 91.5837, 365.1014, 262.3223, 140.2055, 339.5525, 143.2599, 56.2989	826027	Rhmannioside d
30	6.07_196.0969m/z	196.097	6.06768	M+NH4	C10H10O3	43.4	21.9	0.506688	96.0451, 196.0965, 59.0505, 105.0342, 55.9358, 84.9606, 105.9354, 133.0284, 55.0557	122792	(e-p-hydroxy-cinnamic acid
31	6.13_374.1212n	392.155	6.12712	M+NH4, M+Na	C16H22O10	48.9	50.9	-0.218901	70.0664, 397.1103, 86.0976, 84.0818, 55.0556, 84.0453, 81.0347, 85.0296, 86.061, 120.081	64362.4	Swertiamarin
32	6.19_524.1744n	542.208	6.18628	M+H-2H2O, M+NH4, M+Na, M+K	C21H32O15	43.2	19.2	0.440565	147.0439, 70.0663, 119.0492, 72.082, 86.0611, 69.0346, 86.0976, 91.0551, 81.0711, 81.0343	665531	Rehmannioside a
33	6.54_143.0339m/z	143.034	6.54187	M+H	C6H6O4	46.4	33.6	0.295726	143.0337, 99.0447, 69.0347, 84.9607	300713	5-hydroxymethyl -2-furancarboxylic acid
34	6.54_170.0811m/z	170.081	6.54187	M+NH4	C8H8O3	41.4	9.46	-0.35544	70.0663, 169.097, 170.0811, 82.0662, 81.0709, 72.0455, 124.0759, 67.0555, 152.0704, 79.0553	68480.4	4-methoxy -1,2-benzodioxole
35	6.63_112.0530n	113.06	6.63078	M+H, M+Na	C6H8O2	45.2	31.7	4.92561	84.9606, 102.9708, 91.055, 105.0038, 90.9485, 79.0553, 72.9382, 107.0498, 56.9662	1.22657e+06	Dehydromevalonic lactone
36	6.96_166.0630n	167.07	6.95707	M+H-H2O, M+H	C9H10O3	45.2	28.4	0.00270408	84.9607, 149.0596, 93.0707, 121.065, 91.0551, 167.0701, 120.081, 81.0709, 95.0499, 70.0663	92541.8	Vanirom
37	7.54_369.2019m/z	369.202	7.54463	M+Na	C21H30O4	39.5	9.63	-4.94974	70.0663, 91.0583, 73.048, 72.082, 285.159, 190.1225, 285.0092, 268.9772, 84.0818, 150.0913	259001	Corticosterone
38	8.35_147.0440m/z	147.044	8.34847	M+H	C9H6O2	44.8	26.2	-0.121682	84.9607, 91.0551, 119.0494, 147.0439, 146.0601, 65.0399, 102.9709, 121.0287, 99.0448	87051.4	Coumarin
39	8.53_531.3180m/z	531.318	8.52827	M+H	C28H42N4O6	49.7	54.9	0.636023	123.0443, 222.1122, 70.0663, 165.0546, 293.1852, 531.3199, 100.0765, 86.061, 84.0818, 112.1129	134216	Kukoamine b
40	8.77_404.1318n	405.139	8.76803	M+H, M+NH4, M+Na, M+K	C17H24O11	47.7	44.3	-0.131446	70.0663, 91.0583, 86.061, 443.0964, 73.048, 86.0973, 167.0552, 84.0818, 72.082, 84.0455	829842	7,8-dehydropenstemoside
41	8.80_243.0862m/z	243.086	8.79865	M+H	C11H14O6	49.3	48.7	-0.396541	95.05, 151.0389, 86.0974, 84.0454, 125.0236, 123.0443, 167.0336, 197.1278, 67.0556, 97.0291	106873	Methyl (1r,4ar,5r,7as) -1,4a,5-trihydroxy -7-methyl-5,7a-dihydro-1h-cyclopenta[c]pyran -4-carboxylate
42	9.10_205.0972m/z	205.097	9.09533	M+H	C11H12N2O2	43.8	20.1	0.264885	120.081, 91.055, 149.0231, 132.0807, 103.0548, 114.0427, 205.0968, 131.049, 177.1021	440521	Tryptophan
43	9.48_506.1869m/z	506.187	9.48188	M+NH4	C21H28O13	44.2	28.3	0.263088	147.0438, 70.0663, 85.0294, 119.0496, 165.0545, 97.0291, 69.0347, 86.061, 86.0973, 61.0296	140153	Cistanoside f
44	9.96_406.1471n	424.181	9.95995	M+H-2H2O, M+H-H2O, M+H, M+NH4, M+Na, M+K	C17H26O11	49	47.6	-0.936983	91.0589, 73.048, 149.0598, 93.0708, 86.0971, 121.0651, 103.0549, 163.0386, 268.979, 70.0662	3.15085e+07	Methyl 3 -hydroxy-1-methyl-8-[3,4,5-trihydroxy -6-(hydroxymethyl)oxan -2-yl]oxy-1,3,4,4a,8,8a -hexahydropyrano[3,4 -c]pyran-5-carboxylate
45	9.96_226.0839n	227.091	9.95995	M+H-2H2O, M+H-H2O, M+H, 2M+H	C11H14O5	51.6	61.5	-1.15411	119.0859, 159.044, 91.0551, 191.069, 133.0285, 130.1227, 103.055, 105.0705, 95.0864, 112.1126	7.6687e+06	Geniposide deglycosylation
46	9.96_155.0337m/z	155.034	9.95995	M+H	C7H6O4	42.2	16.2	-1.09909	155.0338, 139.0388, 97.0291, 70.0663, 112.0398, 123.0079, 95.0135, 69.0347, 95.0499, 82.0661	77272.1	3,4-dihydroxybenzoic acid
47	9.99_354.0946n	355.102	9.98988	M+H, M+Na	C16H18O9	50.3	58.6	-1.3186	377.0838, 70.0664, 81.0708, 86.0974, 246.2897, 84.0455, 56.0508, 81.0346, 340.9459, 87.9198	852934	Chlorogenic acid
48	10.02_265.1431m/z	265.143	10.0151	M+H	C15H20O4	43.6	25	-1.35855	132.0807, 119.0858, 264.1586, 105.0704, 91.0551, 67.0555, 150.0911, 69.0711, 95.0498, 135.0805	80629.2	Tauremisin
49	10.21_376.1368n	394.171	10.2061	M+H-2H2O, M+H-H2O, M+H, M+NH4, M+Na	C16H24O10	48.5	49.6	-0.425331	109.0653, 69.0347, 81.0709, 84.9605, 105.0704, 70.0663, 85.0294, 179.0701, 127.039, 93.0706	758094	8-epiloganic acid
50	10.85_402.1526n	420.186	10.8489	M+NH4, M+Na	C18H26O10	40.8	12.2	0.100584	70.0663, 91.0552, 86.0974, 72.0821, 85.0293, 97.0292, 86.0611, 84.0817, 69.0347, 57.0349	63473.8	Acetylcatalpol
51	11.12_211.0845n	194.081	11.116	M+H-H2O, M+Na	C10H13NO4	40.8	9.97	0.147375	57.0713, 234.0734, 84.9607, 81.0708, 56.9661, 218.0808, 91.0551, 105.0705, 188.0701, 69.071	61031.9	N-(3,4,5-trimethoxyphenyl)formamide
52	11.39_626.1481n	627.155	11.3869	M+H, M+Na	C27H30O17	38.4	0.458	-0.305002	70.0664, 303.0501, 86.0611, 86.0974, 84.0818, 68.0506, 84.0452	206702	Quercetin -3-o-galactoside -7-o-glucoside
53	12.37_194.0579n	195.065	12.3694	M+H-H2O, M+H	C10H10O4	47.9	42.8	-0.0644326	149.0596, 177.0542, 91.0551, 84.9607, 103.0549, 121.0651, 93.0707, 95.0499, 105.0703, 111.0809	194896	Cis-ferulic acid
54	12.46_358.1259n	359.133	12.4558	M+H, M+Na, M+K, 2M+H	C16H22O9	49.9	52.9	-1.47649	70.0664, 86.0974, 120.0808, 397.0902, 86.0611, 84.0818, 72.0816, 91.5838, 151.0395, 127.0871	3.09957e+06	Sweroside
55	13.34_501.1974m/z	501.197	13.3403	M+H-H2O	C23H34O13	45.6	39.2	1.46726	120.0811, 70.0663, 501.1976	337703	Jioglutoside b
56	13.42_228.0994n	229.107	13.4216	M+H-2H2O, M+H-H2O, M+H	C11H16O5	52	63.3	-1.69676	70.0663, 109.0653, 179.0701, 81.0709, 105.0704, 151.0751, 114.0917, 72.0456, 211.0961, 79.0554	7.3855e+06	8-epiloganin deglycosylation
57	13.42_196.0733n	179.07	13.4216	M+H-2H2O, M+H-H2O, M+H	C10H12O4	51.3	60	-1.47132	109.0655, 81.071, 151.0752, 105.0707, 95.0864, 133.0653, 123.0807, 79.0553, 179.0697, 137.0596	3.29034e+06	Sweroside aglycone
58	13.42_150.0679n	151.075	13.4216	M+H-2H2O, M+H-H2O, M+H	C9H10O2	43.1	18.7	-1.36756	81.0709, 84.9606, 151.0752, 95.0863, 105.0704, 79.0553, 67.0555, 123.0807, 109.0654, 55.0193	498838	2-phenylpropionic acid
59	13.45_390.1519n	408.186	13.4477	M+H-H2O, M+H, M+NH4, M+K	C17H26O10	48.9	47.9	-1.68289	109.0653, 81.0709, 179.07, 149.0232, 105.0704, 151.0753, 133.0649, 229.1066, 55.0557, 123.0807	1.15916e+07	7-epi-loganin
60	13.45_122.0733n	123.081	13.4477	M+H-H2O, M+H	C8H10O	41.9	17.8	1.31086	123.0807, 79.0553, 111.0238, 67.0555, 96.0452, 95.0865, 123.0554, 104.0711, 108.0576, 56.051	88658.3	2-phenylethanol
61	13.82_192.0423n	193.05	13.8231	M+H, M+Na	C10H8O4	51.1	57.2	-0.00908693	70.0662, 95.0501, 134.06, 170.0593, 55.0557, 84.9606, 91.0551, 198.0557, 115.0548, 53.04	313095	Isoscopoletin
62	14.90_800.2729n	818.307	14.902	M+NH4, M+Na	C36H48O20	41	19.2	-1.24007	70.0663, 86.061, 145.0283, 177.0546, 84.0818, 127.0869, 143.0812, 68.0507, 86.0974, 171.0763	162709	Jionoside a1
63	15.53_388.1366n	411.126	15.5298	M+NH4, M+Na	C17H24O10	43.4	23.9	-0.972807	411.1256, 70.0664, 86.0971, 110.073, 179.0314, 120.0806, 72.082, 71.0506, 345.0486, 93.8682	131831	Geniposide
64	15.68_320.0912m/z	320.091	15.6795	M-e	C19H14NO4+	41.4	12.9	-1.7943	320.0911, 292.0959, 277.0726, 262.0856, 290.0803, 318.0753, 93.0706, 249.0775, 79.0553, 67.0555	513076	Coptisine
65	15.98_596.1371n	597.144	15.9789	M+H, M+Na, M+K	C26H28O16	49.3	51.1	-1.02636	70.0663, 86.0609, 635.0992, 84.0816, 86.0974, 147.0435, 68.0507, 120.0811, 110.0717, 129.1024	1.65692e+06	Quercetin 3 -apiosyl-(1->2)-galactoside
66	16.04_336.1223m/z	336.122	16.0389	M-e	C20H18NO4+	45.9	37.1	-2.20047	320.0912, 336.1225, 292.0961, 120.0811, 264.1014	62726.8	Epiberberine
67	16.16_388.2092n	411.198	16.1583	M+NH4, M+Na	C19H32O8	42.5	19.4	-1.35837	411.1986, 70.0698, 203.0529, 86.0975, 84.0816	111385	Rehmaionoside c
68	16.19_520.1944n	538.228	16.1882	M+NH4, M+Na	C26H32O11	39.1	2.98	-0.151498	70.0665, 86.0973, 543.1859, 84.0819, 86.0611, 264.3115, 110.0724, 67.572, 147.7994, 123.0398	153544	(+)-pinoresinol 4 -o-beta-d-glucopyranoside
69	16.31_624.2049n	642.239	16.3083	M+NH4, M+Na	C29H36O15	42.5	18	-0.881074	70.0664, 86.0611, 647.1919, 84.0817, 86.0973, 72.0819, 110.0721, 84.0455, 147.0438, 127.0866	291792	Isoacteoside
70	16.61_338.1381m/z	338.138	16.6075	M-e	C20H20NO4+	46.6	39.4	-1.95346	338.1379, 280.0957, 322.1068, 294.1119, 279.0884, 323.1132, 308.0906, 307.0834, 306.1115, 145.0283	415811	Columbamine
71	16.88_837.2778m/z	837.278	16.878	M+Na	C37H50O20	38	0.0621	-1.19411	70.0663, 86.061, 143.0815, 837.2729, 86.0974, 84.0818, 68.0507, 127.0871, 171.0762, 72.0819	65097.3	Wiedemannioside c
72	17.15_464.0949n	465.102	17.1467	M+H, M+Na, M+K	C21H20O12	50.8	57	-1.26193	487.0844, 185.0419, 325.0311, 70.0663, 86.0975, 324.0231	1.06703e+07	Hyperoside
73	17.15_390.2246n	413.214	17.1467	M+H-2H2O, M+H-H2O, M+NH4, M+Na, M+K	C19H34O8	41.7	18.1	-2.00761	109.1018, 69.0711, 95.0863, 67.0555, 81.071, 91.0589, 93.0705, 69.0346, 105.0703, 107.086	620280	Rehmaionoside a
74	17.33_519.2952m/z	519.295	17.3252	M+H-H2O	C29H44O9	46.7	40.9	-0.129909	109.0653, 301.1792, 519.2948, 86.0974, 283.1688, 70.0663, 86.061, 155.0702, 181.0857, 81.0709	160268	Sengosterone
75	17.39_610.1526n	611.16	17.3859	M+H, M+Na	C27H30O16	50	53.8	-1.24094	70.0664, 633.1404, 86.0611, 72.0819, 86.0975, 331.0991, 84.0817, 110.072, 120.0808, 68.0508	1.02154e+06	Quercetin 3 -o-rhamnopyranosyl
76	17.50_336.1224m/z	336.122	17.5037	M-e	C20H18NO4+	48.1	46.7	-2.14006	336.1225, 320.0913, 292.0962, 278.0808, 321.0967, 304.0963, 306.0752, 318.0761, 307.0811	952409	Berberine
77	17.77_352.1538m/z	352.154	17.772	M-e	C21H22NO4+	44.9	30.3	-1.71918	352.1541, 337.1278, 321.0996, 294.1114, 322.1063, 336.1227, 293.1043, 308.1277, 292.0963, 320.1277	1.02748e+06	Palmatine
78	18.52_448.0998n	449.107	18.5229	M+H, M+Na	C21H20O11	53	73.4	-1.76058	471.0836, 147.0393, 70.0663, 119.0495, 86.0973, 185.0418, 309.0339, 91.584, 84.0819, 84.0452	259536	Kaempferol 3 -o-bata-d-galactopyranoside
79	18.58_332.1827n	355.172	18.5814	M+H, M+NH4, M+Na, M+K	C16H28O7	42.1	19.2	-2.51722	153.1273, 81.0709, 71.0503, 93.0707, 107.086, 135.1168, 73.0659, 91.5846, 79.0553, 69.0711	703446	Angelicoidenol 2 -o-beta-d-glucopyranoside
80	18.61_152.1198n	153.127	18.6102	M+H-H2O, M+H	C10H16O	44.7	29.2	-1.85232	81.0709, 84.9607, 93.0707, 107.0862, 71.0504, 79.0553, 88.9535, 135.1168, 111.0237, 70.0664	157842	Pulegone
81	18.61_380.1099n	381.117	18.6102	M+H-H2O, M+H	C18H20O9	49.1	54.1	-2.23455	141.0545, 109.0289, 153.0181, 211.0963, 127.0391, 53.04, 81.0346, 81.0712, 111.081, 95.0499	464501	Cornuside deglycosylation
82	18.61_520.3028n	503.299	18.6102	M+H-2H2O, M+H-H2O, M+H, M+Na, 2M+H	C29H44O8	52.3	66.2	-1.62885	301.1793, 503.2995, 111.0809, 283.1688, 93.0707, 55.0556, 109.0653, 81.0709, 145.101, 105.0704	1.01971e+07	Precyasterone
83	18.61_542.1627n	560.197	18.6102	M+H, M+NH4, M+Na, M+K	C24H30O14	43.3	20.5	-1.59455	141.0544, 109.0288, 153.018, 211.096, 111.0811, 127.0393, 81.0346, 70.0664, 81.0711, 179.0703	4.75414e+06	Cornuside
84	19.14_478.1109n	479.118	19.1396	M+H, M+Na, M+K	C22H22O12	46.4	35.4	-0.420366	501.0997, 185.0418, 338.0403, 70.0663, 86.0973, 84.0817	809482	Isorhamnetin 3 -galactoside
85	19.14_317.0652m/z	317.065	19.1396	M+H	C16H12O7	45.7	33.8	-1.34506	317.0652, 153.018, 229.0493, 302.0418, 93.0343, 92.0265, 285.0385, 274.0453, 228.041, 246.0511	79539.5	Isorhamnetin
86	19.23_313.1309n	314.138	19.23	M+H, M+Na	C18H19NO4	45.7	33.6	-1.73699	336.123, 320.0901, 278.0809, 292.097, 321.0966, 119.0859, 93.0704, 91.0551, 81.0708, 70.0661	429491	Lyciumide a
87	19.74_340.1307n	341.138	19.7379	M+H-H2O, M+H	C20H20O5	39.4	3.68	-1.03266	137.0597, 227.0701, 187.075, 291.1009, 248.0829, 211.0753, 323.1284, 203.085, 255.0633, 271.0951	67227.3	Burchellin
88	19.89_264.1358n	247.133	19.886	M+H-2H2O, M+H-H2O, M+Na	C15H20O4	50.4	57.3	-1.18017	187.1116, 91.0552, 119.086, 107.0862, 105.0704, 135.0806, 201.1269, 173.1322, 93.0708, 247.1329	94880.3	Abscisic acid
89	20.09_208.1462n	209.153	20.0946	M+H-2H2O, M+H-H2O, M+H	C13H20O2	48.4	47.5	-0.863891	84.9608, 69.071, 125.0963, 191.1466, 69.0348, 91.0551, 107.0859, 55.0556, 109.0654, 67.0555	60299.6	3-hydroxy-β-ionone
90	20.16_652.2360n	670.27	20.1552	M+NH4, M+Na	C31H40O15	46.7	40.1	-1.06338	675.2255, 70.0664, 86.0973, 86.061, 110.0719, 529.1656, 84.0816, 72.082, 120.0814, 262.5298	210938	Martynoside
91	20.36_477.3210m/z	477.321	20.364	M+H-H2O	C28H46O7	52.3	68.9	-0.159413	69.0711, 95.0865, 301.1808, 55.0556, 83.0864, 81.0709, 93.0706, 113.0964, 86.0974, 249.1487	106387	Makisterone b
92	21.20_610.1319n	611.139	21.1953	M+H, M+Na	C30H26O14	42.6	16.6	-0.641308	70.0681, 86.0969, 84.0817, 572.1124, 163.0387, 120.0812, 441.7666, 222.3727, 159.0431, 170.2813	114067	Kaempherol 3 -(6-caffeoylglucoside)
93	21.23_303.0495m/z	303.049	21.2259	M+H	C15H10O7	50.9	59.2	-1.46833	303.0495, 153.0181, 137.0234, 229.0491, 201.0543, 68.9983, 257.0444, 165.0179, 121.0286	197640	Quercetin
94	21.97_508.3398n	509.347	21.9696	M+H-2H2O, M+H-H2O, M+H, M+Na	C29H48O7	50.3	57	-0.369276	55.0557, 83.0865, 473.325, 301.1798, 81.0709, 97.1018, 93.0707, 105.0705, 79.0553, 69.0711	386891	Amarasterone a2
95	22.68_664.2001n	687.189	22.6826	M+NH4, M+Na	C31H36O16	38.3	13.1	-0.412964	687.1934, 70.0663, 86.0974, 317.0833, 84.0818, 110.0716, 120.0808, 136.0757, 84.0452, 541.2292	77871.2	Cuscutoside b
96	23.60_219.0650m/z	219.065	23.5995	M+H	C12H10O4	51.8	61.2	-0.749013	219.0649, 187.0388, 131.0492, 135.0803, 176.0467, 105.0704, 148.0516, 191.0697, 91.055, 163.075	141564	6-ethyl-2,5-dihydroxy -1,4-naphthoquinone
97	24.34_504.3086n	487.305	24.3405	M+H-H2O, M+Na	C29H44O7	41	10.6	-0.222357	527.296, 70.0663, 426.3453, 86.0978, 91.5835, 405.2936, 129.1137, 292.2966, 120.0813, 90.7535	158509	Capitasterone
98	25.11_645.2918m/z	645.292	25.1106	M+Na	C38H42N2O6	38	0	-2.79992	645.2885, 70.0664, 166.0863, 86.0975, 136.0758, 120.0811, 297.1212, 337.1155, 172.0387, 285.1198	68664.6	Isotetrandrine
99	26.69_285.0755m/z	285.075	26.6943	M+H	C16H12O5	49	49.2	-1.00969	270.0518, 285.0753, 284.2941, 57.0713, 98.985, 63.0009	70789	Physcion
100	27.20_265.1907m/z	265.191	27.1985	M+H	C15H24N2O2	48.2	48	-1.29943	123.092, 265.1909, 247.1801, 122.0842, 135.0917, 149.1074, 55.0558, 219.1859, 79.0551, 67.0556	83338.4	Sophoranol
101	27.41_278.2243n	279.232	27.4066	M+H-H2O, M+H	C18H30O2	40.5	6.22	-1.09771	149.0233, 219.0568, 279.0933, 67.0555, 81.0709, 95.0863, 201.0463, 93.0707, 79.0553, 55.0557	181142	(z,z,z)-9,12,15-octadecatrienoic acid
102	28.18_290.2686m/z	290.269	28.1825	M+NH4	C16H32O3	40.6	7.61	-1.26073	88.0766, 290.2681, 57.0713, 56.0509, 74.061, 242.2467, 118.0868, 85.1021, 71.0867, 67.0553	104218	(r)-2-hydroxytetradecanoic acid ethyl ester
103	28.99_290.1746m/z	290.175	28.9893	M+H	C17H23NO3	39.6	2.87	-1.69917	57.0713, 88.0765, 55.0557, 69.0711, 79.0552, 81.0709, 91.0551, 67.0556, 93.0709, 105.0703	250234	Atropine
104	28.99_244.1097n	245.117	28.9893	M+H, M+Na	C15H16O3	40.7	6.84	-1.10426	57.0716, 55.0557, 267.0988, 67.0555, 81.071, 95.0863, 69.0712, 83.0868, 91.0551, 79.0555	1.76908e+06	3-[2-(3-hydroxyphenyl)ethyl] -5-methoxyphenol
105	30.01_229.0858m/z	229.086	30.0055	M+H	C14H12O3	43.9	22.8	-0.691727	229.0857, 131.0493, 175.0388, 187.0387, 159.044, 95.0863, 55.0558, 147.0439, 67.0557, 214.0622	278224	10,11-dihydro-dibenz[b,f]oxepin -2,4-diol
106	31.89_353.1017m/z	353.102	31.8914	M+H-H2O	C20H18O7	50.4	57.8	-0.676537	135.044, 149.023, 79.0552, 353.1023, 81.073, 67.0555	195306	Neo-sesamin
107	32.69_195.0652m/z	195.065	32.6915	M+H-H2O	C10H12O5	44.5	26.4	0.226902	163.0388, 55.9358, 105.9354, 104.9639, 84.9606, 90.9486, 123.9454, 72.9383, 150.9689, 167.9715	64548.5	Swertiamarin deglycosylation
108	32.78_293.2094m/z	293.209	32.7815	M+Na	C16H30O3	45.3	31.7	2.51428	55.0562, 67.0555, 81.0709, 93.0706, 79.0553, 95.0502, 57.0714, 69.0713, 91.0552, 95.0864	388515	11-hexadecanoic acid
109	33.05_330.3364m/z	330.336	33.0453	M+NH4	C20H40O2	45.3	30.1	-0.798865	330.3363, 98.9849, 57.0713, 70.0663, 88.0766, 91.055, 71.0868, 106.0869, 102.092, 55.0556	849923	Arachidic acid
110	34.59_294.1255n	295.133	34.5913	M+H, M+Na	C19H18O3	41.8	11.6	-0.321384	57.0713, 88.0767, 91.055, 317.1147, 93.0708, 67.0555, 133.1008, 84.9608, 69.0712, 95.086	89674	1,7-bis(4-hydroxyphenyl)hepta -4,6-dien-3-one
111	34.77_281.2474m/z	281.247	34.7707	M+H	C18H32O2	45.8	32.3	-0.536141	55.0557, 69.0711, 81.0709, 67.0555, 95.0863, 149.0232, 83.0865, 57.0713, 93.0707, 109.1017	150760	11,14-octadecadienoic acid
112	34.83_358.3678m/z	358.368	34.8293	M+NH4	C22H44O2	46.3	35.1	-0.543375	358.3675, 70.0664, 88.0766, 57.0713, 106.0869, 71.0867, 102.0921	929539	Docosanoic acid
113	36.69_328.2613n	351.25	36.6875	M+H-H2O, M+H, M+NH4, M+Na	C19H36O4	45	30.4	-0.306727	55.0557, 69.0712, 60.0821, 57.0714, 81.071, 67.0555, 311.2581, 95.0863, 83.0866, 79.0551	117109	Linoelaidic acid
114	36.81_262.2295n	280.263	36.8073	M+H-H2O, M+H, M+NH4	C18H30O	42.1	14.8	-0.818911	81.071, 245.227, 91.055, 95.0863, 67.0555, 93.0706, 57.0713, 79.0553, 70.0664, 55.0557	258004	Farnesylacetone
115	38.03_330.2766n	353.266	38.0344	M+H-H2O, M+H, M+NH4, M+Na	C19H38O4	43.1	20.3	-1.32357	57.0713, 313.2733, 71.0867, 57.0349, 95.0864, 81.0709, 67.0555, 55.0557, 85.1022, 69.0711	9.45092e+06	2-monopalmitin
116	38.48_473.3618m/z	473.362	38.4808	M+H	C30H48O4	37.4	0.77	-1.63114	88.1132, 91.5797, 57.0714, 277.0042, 55.0557, 111.0443, 83.0502, 80.9489, 101.0603, 348.3476	387997	Maslinic acid
117	43.44_426.3857n	449.375	43.4356	M+H-H2O, M+H, M+Na	C30H50O	41.9	17	-1.2065	95.0863, 81.0709, 69.0711, 107.0861, 67.0555, 109.1019, 93.0708, 80.9489, 62.9832, 55.0558	158573	24-methylidenelophenol
118	48.54_919.0810m/z	919.081	48.5426	M+H-2H2O	C41H30O27	37.2	0	-2.72528	919.0825, 918.878, 911.6246, 853.5803, 795.5418, 737.4988, 918.6706, 915.8793, 679.4559, 915.4738	5.60128e+06	Isoterchebin
119	51.57_369.3513m/z	369.351	51.5738	M+H-H2O	C27H46O	40.4	8.59	-0.774563	91.0583, 73.048, 81.0709, 285.0095, 268.9781, 95.0862, 67.0555, 147.1165, 109.1018, 105.0705	273859	Cholesterol
120	51.92_299.2941m/z	299.294	51.9229	M+H	C19H38O2	39.2	1.23	-1.10259	57.0712, 55.0557, 84.9609, 69.0712, 91.0586, 299.0618, 73.0479, 81.071, 71.0865, 67.0557	97242.3	Nonadecylic acid
121	0.81_225.0612m/z	225.061	0.811633	M+FA-H	C6H12O6	46.2	35.2	-2.02582	179.0551, 78.9569, 110.0704, 87.0065, 154.0606, 96.9672, 92.9257, 80.9628, 104.033, 96.9579	179434	D-(+)-mannose
122	0.90_665.2167m/z	665.217	0.90365	M-H	C24H42O21	54.4	83.5	3.23938	59.0115, 71.0115, 89.0221, 101.0223, 665.2179, 179.0553, 113.0224, 383.121, 85.0272, 73.0272	3.59473e+06	Stachyose
123	1.27_275.0223m/z	275.022	1.26678	M-H	C10H12O7S	37.8	1.86	-2.90803	115.0017, 275.0226, 159.0093, 71.0115	853997	Dihydroisoferulic acid
124	1.29_504.1705n	549.169	1.2866	M-H, M+FA-H	C18H32O16	48	45.9	2.96121	59.0114, 71.0115, 89.0221, 503.1638, 101.0222, 179.0553, 113.0224, 85.0272, 119.033, 323.0984	2.37511e+06	Gentianose
125	1.57_337.0785m/z	337.079	1.57048	M-H	C12H18O11	52.3	65.4	2.64085	337.0791, 113.9939, 277.0577, 174.0156	5.4444e+06	2-o-alpha-d-glucopyranosyl -l-ascorbic acid
126	2.29_828.2785n	827.271	2.29265	M-H, M+FA-H	C30H52O26	52.7	73.5	4.56145	59.0114, 71.0114, 89.0222, 179.0552, 101.0222, 341.1099, 665.2142, 85.0273, 113.0221, 119.033	211609	Verbascose
127	3.10_362.1223n	407.12	3.09897	M-H, M+FA-H	C15H22O10	42.1	14.9	2.64941	97.0271, 71.0115, 199.0609, 169.0488, 85.0275, 59.0117, 361.1167, 61.986, 125.0225, 407.1198	615896	Catalpol
128	4.31_450.1387n	495.137	4.30913	M-H, M+FA-H	C18H26O13	43.1	21.8	2.91869	59.0114, 449.1283, 71.0116, 89.0221, 101.0224, 61.9861, 113.0219, 85.027, 87.0065, 125.0229	827326	5-[(6-o-alpha-d-glucopyranosyl -alpha-d-glucopyranosyl)oxymethyl] -2-furancarbaldehyde
129	4.55_361.0787m/z	361.079	4.54575	M-H	C14H18O11	53.3	72.7	2.89246	271.0467, 125.0228, 211.0244, 169.013, 168.0052, 59.0115, 124.0143, 71.0115, 361.0764, 107.0117	3.098e+06	7-o-galloyl-sedoheptulose
130	4.57_271.0830m/z	271.083	4.5745	M+FA-H	C11H14O5	45.1	31.4	3.09894	271.0831, 125.0224, 99.0427, 59.0114, 211.0249, 71.0115, 85.0272, 224.9705, 139.0385, 97.0273	46807.9	Cornin deglycosylation
131	4.69_288.0855n	333.084	4.69408	M-H, M+FA-H	C12H16O8	42.4	19	3.28329	59.0115, 71.0115, 80.9629, 93.0326, 125.0226, 113.4778, 85.0271, 214.0319, 261.0224, 113.71	232270	5-(alpha-d-glucopyranosyloxymethyl) -2-furancarboxaldehyde
132	5.41_362.1223n	407.121	5.40992	M-H, M+FA-H	C15H22O10	41.1	11.6	2.79184	71.0115, 59.0115, 61.9859, 89.022, 361.116, 99.0065, 72.9907, 407.1181, 101.0228, 389.1095	152337	(2s,3r,4r,5s,6r) -2-[[(1s,4as,5r,7ar) -4a,5-dihydroxy -7-(hydroxymethyl) -5,7a-dihydro-1h-cyclopenta[c]pyran -1-yl]oxy]-6-(hydroxymethyl)oxane -3,4,5-triol
133	5.68_391.1258m/z	391.126	5.67588	M+FA-H	C15H22O9	41.9	16.5	3.52595	59.0115, 97.0273, 71.0114, 391.127, 89.0219, 61.9861, 101.0223, 123.0437, 69.032, 113.0222	216052	Jioglutoside a
134	5.97_686.2297n	731.228	5.97302	M-H, M+FA-H	C27H42O20	43.1	21.8	4.02956	59.0115, 71.0115, 89.0219, 101.0223, 685.2273, 179.055, 221.0667, 113.0224, 85.027, 263.0769	2.11141e+06	Rhmannioside d
135	6.12_373.1149m/z	373.115	6.12163	M-H	C16H22O10	48.6	49.9	2.35531	123.0433, 59.0114, 71.0115, 193.0495, 149.0585, 373.1119, 89.022, 69.0323, 121.0638, 167.0692	388011	Swertiamarin
136	6.18_524.1756n	569.174	6.18168	M-H, M+FA-H	C21H32O15	40.6	7.53	2.81285	59.0114, 71.0114, 89.022, 119.0331, 179.0553, 101.0223, 523.169, 85.0273, 113.0219, 181.0506	1.19394e+06	Rehmannioside a
137	6.81_393.1415m/z	393.141	6.81285	M+FA-H	C15H24O9	47.4	44.7	3.60578	393.1393, 59.0115, 61.986, 71.0116, 167.0701, 246.3528, 347.1358, 184.9187, 127.0389, 141.0328	125649	Ajugol
138	8.54_345.1198m/z	345.12	8.54378	M-H	C15H22O9	51.4	65.9	2.11318	59.0115, 71.0114, 299.1143, 89.0221, 163.06, 345.12, 119.0485, 85.0271, 101.0219, 119.0328	40541.8	Aucubin
139	8.78_449.1312m/z	449.131	8.78377	M+FA-H	C17H24O11	47.9	47.1	2.85685	449.1306, 59.0114, 95.0479, 101.022, 89.0221, 139.0018, 71.0115, 127.0386, 68.996, 241.0722	1.11571e+06	7,8-dehydropenstemoside
140	9.46_487.1468m/z	487.147	9.4634	M-H	C21H28O13	42	16.3	2.20173	119.0483, 163.0388, 145.028, 117.0326, 487.1489	613209	Cistanoside f
141	9.97_406.1484n	451.147	9.96557	M-H, M+FA-H	C17H26O11	44.6	26.9	2.22255	101.0223, 155.0336, 243.0882, 141.0541, 95.0116, 68.9958, 59.0115, 405.1437, 123.0431, 71.0115	7.53569e+07	Methyl 3 -hydroxy-1-methyl-8-[3,4,5-trihydroxy -6-(hydroxymethyl)oxan -2-yl]oxy-1,3,4,4a,8,8a -hexahydropyrano[3,4 -c]pyran-5-carboxylate
142	9.97_354.0958n	353.089	9.96557	M-H, M+Na-2H	C16H18O9	49.4	53.2	2.08842	59.0114, 69.0322, 213.0765, 71.0114, 95.0482, 113.0223, 135.0435, 375.0712, 89.0222, 169.0859	4.64622e+06	Chlorogenic acid
143	10.21_376.1377n	375.13	10.2094	M-H, M+FA-H	C16H24O10	45.3	32.8	1.89456	375.1308, 69.0322, 59.0116, 336.4576, 416.7419, 179.0317, 119.612, 211.7111, 409.7247, 71.0114	5.50883e+06	8-epiloganic acid
144	10.83_483.0795m/z	483.079	10.8319	M-H	C20H20O14	55.8	88.8	2.99594	125.0226, 169.013, 331.0685, 483.076, 439.089, 287.0773, 313.0577	51528.3	Gallic acid -3-o-(6'-o-galloyl)glucoside
145	10.86_447.1522m/z	447.152	10.8613	M+FA-H	C18H26O10	51.7	64.8	3.41117	269.1031, 71.0113, 59.0114, 401.1463, 101.0224, 61.9859, 447.1532, 85.0268, 161.0445, 73.0271	100403	Acetylcatalpol
146	11.19_517.1572m/z	517.157	11.1929	M-H	C22H30O14	44.1	28.8	1.75818	160.0154, 134.0356, 193.0497, 175.0391, 132.0199, 517.1567, 178.0264, 59.0114, 71.0117, 61.9859	193320	6'-o-beta-d-glucosylgentiopicroside
147	11.37_515.1552m/z	515.155	11.3722	M+Na-2H	C24H30O11	47.3	52.1	3.41173	515.1568, 61.9859, 191.0552, 134.0353, 96.958, 261.1071, 140.8162, 119.8028, 173.9321, 121.6661	86368.2	6-o-p-coumaroylajugol
148	11.37_625.1431m/z	625.143	11.3722	M-H	C27H30O17	47.9	46.7	3.28924	271.0261, 299.0213, 462.0861, 301.0359, 625.145, 151.0019, 243.0306	517741	Quercetin -3-o-galactoside -7-o-glucoside
149	11.52_355.1044m/z	355.104	11.5221	M+FA-H	C15H18O7	45	31.9	2.94583	134.0356, 193.0499, 178.026, 149.0587, 191.0556, 137.0228, 160.015, 59.0115	164443	Mellitoxin
150	11.64_284.1630n	283.156	11.642	M-H, M+FA-H	C15H24O5	41.3	11.9	2.07851	147.0435, 59.0115, 91.5887, 328.112, 71.0113, 101.0222, 72.9903, 193.0266, 219.1524, 218.2528	88330.4	Sec-hydroxyaeginetic acid
151	12.32_613.1905m/z	613.191	12.3229	M+Na-2H	C29H36O13	34.3	1.17	0.408266	61.986, 245.0933, 613.1913, 98.0225, 116.0489, 203.0824, 59.0115, 74.0222, 227.0835, 101.0222	158058	Jionoside c
152	12.43_421.1643m/z	421.164	12.4348	M+Na-2H	C23H28O6	36.9	5.41	2.67762	61.986, 91.5825, 164.5695, 63.9903, 57.7497, 61.2336, 56.0228, 64.9503	99963.9	Hancinone c
153	12.43_358.1270n	403.125	12.4348	M-H, M+FA-H	C16H22O9	42	15.9	1.78224	403.1248, 81.0322, 125.0227, 59.0115, 89.0223, 71.0115, 195.0658, 160.8282, 121.3075, 130.5952	7.81503e+06	Sweroside
154	13.41_227.0919m/z	227.092	13.4134	M-H	C11H16O5	38.4	7.16	-2.50252	67.0165, 127.0381, 101.0223, 68.9958, 59.0114, 227.092, 225.1129, 181.0754, 180.912, 152.9163	121504	8-epiloganin deglycosylation
155	13.41_390.1530n	435.151	13.4134	M-H, M+FA-H	C17H26O10	42.9	17.5	1.15514	435.151, 101.0222, 127.038, 227.0926, 67.0165, 290.961, 132.235, 297.9468, 111.4073, 128.3806	5.56212e+07	7-epi-loganin
156	13.50_785.2536m/z	785.254	13.4957	M-H	C35H46O20	45.5	37	3.32266	161.023, 133.0276, 135.0435, 785.2499, 101.0222, 59.0114, 71.0114, 623.2191, 91.5819, 127.0382	457715	Purpureaside b
157	13.68_446.1802n	491.178	13.6761	M-H, M+FA-H	C20H30O11	38.3	3.17	3.14525	59.0115, 101.0223, 445.1737, 61.986, 71.0115, 89.0219, 488.1638, 454.291, 472.8304, 470.9318	49046.3	Cistanoside g
158	14.73_465.1623m/z	465.162	14.7303	M+FA-H	C18H28O11	38.9	1.15	2.22844	61.986	68702.3	7-o-methyl morroniside
159	14.88_799.2695m/z	799.269	14.8806	M-H	C36H48O20	52.4	70.5	3.55961	160.0151, 799.2702, 175.0393, 623.2236, 59.0114, 132.02, 134.0355, 71.0115, 123.0429, 135.0438	628816	Jionoside a1
160	15.30_607.1690m/z	607.169	15.2995	M-H	C28H32O15	38.9	5.4	3.4714	119.0483, 93.0325, 145.0279, 137.0231, 163.0392, 161.0226, 59.0116, 61.986, 281.0667, 607.1708	46774.1	Physcion-8-o-beta-d-gentiobioside
161	15.54_433.1360m/z	433.136	15.5404	M+FA-H	C17H24O10	40.5	6.39	2.22896	59.0114, 155.0337, 71.0115, 95.0116, 152.9942, 433.1353, 78.9567, 91.5816, 101.0223, 225.0782	315692	Geniposide
162	15.96_595.1320m/z	595.132	15.9634	M-H	C26H28O16	56.4	86.3	2.60791	300.0283, 271.0258, 595.1315, 255.0306, 243.0302	5.97477e+06	Quercetin 3 -apiosyl-(1->2)-galactoside
163	16.12_527.1418m/z	527.142	16.1151	M+FA-H	C22H26O12	39.9	4.49	2.47524	125.0226, 169.013, 527.1447, 107.0119, 59.0115, 61.986, 69.0322, 71.0115, 375.13, 89.022	102321	Catalposide
164	16.15_433.2088m/z	433.209	16.1459	M+FA-H	C19H32O8	39.5	2.6	2.28532	59.0115, 71.0113, 433.1645, 433.209, 78.9565, 249.0629, 61.9859, 85.0272, 152.9947, 75.0065	152250	Rehmaionoside c
165	16.18_520.1957n	519.188	16.1758	M-H, M+FA-H	C26H32O11	47.2	42.1	2.3575	136.0148, 151.0385, 357.1364, 61.986, 119.0483, 519.1915, 414.7548, 434.6969, 121.0281, 108.0192	226647	(+)-pinoresinol 4 -o-beta-d-glucopyranoside
166	16.30_624.2072n	623.2	16.2966	M-H, M+Na-2H	C29H36O15	47	39.4	2.77798	645.1884, 153.0544, 161.0231, 123.0432, 61.986, 133.0279, 135.0434, 319.0815, 71.0115, 207.0275	1.48652e+06	Isoacteoside
167	16.63_515.1205m/z	515.12	16.6304	M-H	C25H24O12	48.1	50.3	1.91056	191.055, 135.0435, 179.0336, 353.0892, 85.0272, 161.0229, 61.9859	70309.1	3,4-dicaffeoylquinic acid
168	16.87_813.2857m/z	813.286	16.8731	M-H	C37H50O20	44.1	28.7	4.21996	160.0152, 175.0392, 813.289, 132.0199, 134.0356, 59.0114, 71.0115, 193.0499, 89.022	352866	Wiedemannioside c
169	17.14_464.0964n	463.089	17.1422	M-H, M+Na-2H	C21H20O12	55.3	80.2	2.07665	323.0183, 151.0022, 271.0251, 301.0354, 107.0118, 300.028, 485.0724, 256.0371, 65.0006, 255.03	2.68104e+07	Hyperoside
170	17.17_435.2242m/z	435.224	17.173	M+FA-H	C19H34O8	49.6	52.4	1.56072	435.2247, 59.0115, 71.0114, 389.2212, 91.5888, 89.0222, 189.3459, 148.6656, 85.0348	916812	Rehmaionoside a
171	17.32_536.2998n	581.298	17.3235	M-H, M+FA-H	C29H44O9	48	45.3	2.33895	535.2922, 125.0589, 391.2141, 61.9859, 285.0382, 581.2969, 227.0337, 256.0341, 255.0309, 85.0272	346971	Sengosterone
172	17.38_609.1478m/z	609.148	17.3837	M-H	C27H30O16	53.4	71.3	2.74749	271.0256, 300.0283, 609.1491, 255.0306, 243.0303, 314.0446, 151.0019, 299.0207, 227.0353, 107.0119	3.8959e+06	Quercetin 3 -o-rhamnopyranosyl
173	17.62_259.0977m/z	259.098	17.6234	M-H	C15H16O4	37.7	0	0.348718	259.0983, 258.1018, 171.0821, 87.0043, 259.0247	61459.9	Tristin
174	18.20_515.1205m/z	515.12	18.1961	M-H	C25H24O12	44.1	25.4	1.93575	135.0435, 173.0445, 93.0324, 179.0339, 191.0555, 515.121, 353.0892, 161.0238, 91.5823, 61.9861	103364	3,5-di-o-caffeoylquinic acid
175	18.29_359.0782m/z	359.078	18.2879	M+FA-H	C17H14O6	49.2	52.8	2.95744	161.0231, 133.0278, 135.0434, 72.9907, 123.0431, 197.0449, 179.0338, 359.0785	69529.7	Nepetoidin b
176	18.53_447.0941m/z	447.094	18.5311	M-H	C21H20O11	54.1	74.6	1.84394	227.0349, 255.0306, 284.0336, 447.0949, 285.0398	423741	Kaempferol 3 -o-bata-d-galactopyranoside
177	18.59_377.1824m/z	377.182	18.59	M+FA-H	C16H28O7	39.1	0.663	2.0142	130.0854, 61.9862, 376.2271, 295.4283, 216.6333, 111.0799, 232.7004, 140.995, 289.0255, 98.3424	231464	Angelicoidenol 2 -o-beta-d-glucopyranoside
178	18.62_520.3047n	565.303	18.6175	M-H, M+FA-H	C29H44O8	43.4	21.7	2.07023	565.3041, 519.2982, 87.0428, 85.0274, 91.5888	1.16133e+07	Precyasterone
179	18.62_541.1574m/z	541.157	18.6175	M-H	C24H30O14	46.4	35.6	2.02639	125.0226, 169.013, 541.1583	1.7976e+07	Cornuside
180	18.62_637.2158m/z	637.216	18.6175	M-H	C30H38O15	35.5	11.6	3.08198	161.0231, 96.9579, 133.0278, 637.2233, 195.0098, 116.9265, 71.0114, 151.0193, 59.0115, 145.0277	77907	Jionoside d
181	18.62_709.3545m/z	709.355	18.6175	M+Na-2H	C38H56O11	32.4	1.63	-3.46647	709.3575, 125.0954, 187.0967, 127.049, 214.156, 428.2208, 467.2278, 97.0641, 101.0699, 259.1478	69242.6	Methylcimicifugoside
182	18.85_505.1002m/z	505.1	18.8549	M-H	C23H22O13	52.2	70.8	2.83155	271.0257, 300.0285, 505.1005, 243.0305, 255.0304, 227.0344, 151.0022	51346.3	6'-o-acetylhyperoside
183	18.89_232.1308n	231.124	18.8859	M-H, M+Na-2H	C11H20O5	48.2	45.1	-0.992415	193.0839, 253.1062, 145.988, 235.0952, 164.9953, 189.9957, 166.9917, 190.9923, 253.0516, 116.9937	67890.8	Jioglutin e
184	19.16_477.1049m/z	477.105	19.1556	M-H	C22H22O12	46.3	35.7	2.24275	243.0303, 271.0255, 314.0446, 477.106, 270.0177, 285.0409, 242.0227, 257.0465, 299.0206, 227.0353	1.1589e+06	Isorhamnetin 3 -galactoside
185	19.16_593.1529m/z	593.153	19.1556	M-H	C27H30O15	55.4	84.4	2.84623	255.0306, 285.041, 227.0351, 593.1531, 284.0338, 229.0511, 257.0461	206976	Kaempferol 3 -o-alpha-l-rhamnopyranosyl(1 ->6)-beta-d-galactopyranoside
186	19.25_312.1251m/z	312.125	19.2464	M-H	C18H19NO4	46.2	38	3.09303	148.0514, 312.1254, 178.0495, 135.0434, 190.0499, 297.1018, 147.0438, 134.0359	96709.4	Lyciumide a
187	19.28_583.1112m/z	583.111	19.2765	M-H	C28H24O14	47.9	46.7	3.15307	300.0286, 271.0258, 61.986, 583.1107, 255.0306, 243.0298, 463.0875, 151.0021, 107.012	60614.6	P-hydroxybenzoyl -quercetin -3-o-galactoside
188	20.18_651.2316m/z	651.232	20.1779	M-H	C31H40O15	46.1	35.8	3.26467	160.0152, 175.039, 651.2322, 132.0199, 134.0355, 59.0115, 113.0224, 85.0272, 71.0114, 193.05	400064	Martynoside
189	20.36_523.1832m/z	523.183	20.359	M-H	C25H32O12	47.7	45.3	2.16643	134.0356, 193.0497, 160.0152, 523.1852, 132.0201, 175.039, 178.0266, 117.0326	87014.5	6-feruloylajugol
190	20.39_539.3240m/z	539.324	20.389	M+FA-H	C28H46O7	53.5	72	2.84732	539.3253, 493.3211, 173.1175	580410	Makisterone b
191	21.20_609.1269m/z	609.127	21.1981	M-H	C30H26O14	40.5	9.19	3.15856	271.0257, 300.0285, 255.0306, 609.1282, 463.0901, 151.0024, 243.0304, 227.0345, 163.0024	195458	Kaempherol 3 -(6-caffeoylglucoside)
192	21.23_301.0359m/z	301.036	21.2288	M-H	C15H10O7	49.4	51.3	1.83433	301.0363, 151.0022, 107.0118, 121.0275, 65.0009, 178.9977, 83.0115, 63.0216, 93.0323	654718	Quercetin
193	21.98_553.3397m/z	553.34	21.9776	M+FA-H	C29H48O7	47.8	43.7	2.9811	553.3407, 507.3347, 319.1928, 91.5894, 61.986, 113.0955, 187.1334, 162.0263, 447.7, 160.5961	449537	Amarasterone a2
194	22.67_664.2024n	663.195	22.6653	M-H, M+FA-H	C31H36O16	47.1	42.8	3.0766	369.0991, 663.1957, 108.0197, 121.0277, 84.0193, 136.0149, 165.018	371296	Cuscutoside b
195	23.44_285.0410m/z	285.041	23.4373	M-H	C15H10O6	45.7	34.4	2.00321	285.0414, 216.9894, 178.9911, 244.9843, 93.0324	123393	Kaempferol
196	24.35_549.3084m/z	549.308	24.3505	M+FA-H	C29H44O7	38.6	0	2.89639	549.3109, 61.9862, 91.5826, 354.2841, 362.6509, 438.8607, 261.1746, 61.9235, 352.495, 89.7823	125961	Capitasterone
197	25.12_643.2791m/z	643.279	25.1152	M+Na-2H	C38H42N2O6	48.4	55	0.242896	122.0593, 152.0701, 643.2762, 611.2526, 489.1909, 402.1829, 120.0798, 223.0879, 444.1975, 458.3611	42808.3	Isotetrandrine
198	28.13_287.2234m/z	287.223	28.1277	M+FA-H	C15H30O2	44.9	30.5	2.74256	287.2239	318897	Pentadecylic acid
199	28.45_269.0825m/z	269.083	28.4489	M-H	C16H14O4	46	36.3	2.16959	269.0829, 210.0685, 254.0593, 225.0556, 253.0515, 209.0605	77362.2	3,5-dimethoxy -2,7-phenanthrenediol
200	30.81_497.1688m/z	497.169	30.8064	M-H	C23H30O12	39	5.95	4.67041	171.9825, 497.167, 108.0196, 79.955, 93.0323, 289.0555	259632	6-o-vanilloylajugol
201	32.68_315.2546m/z	315.255	32.6771	M+FA-H	C17H34O2	43.2	20.4	1.86084	315.2548, 315.2014, 313.2412	127875	Daturic acid
202	32.76_269.2128m/z	269.213	32.7628	M-H	C16H30O3	41.9	14.5	2.12362	269.2132, 98.9537, 267.1453	267932	11-hexadecanoic acid
203	37.47_457.2372m/z	457.237	37.4718	M+Na-2H	C28H36O4	38	0	2.73288	78.9567, 152.9943, 457.2375, 96.9675	220946	Daturilin
204	38.32_455.3541m/z	455.354	38.3168	M-H	C30H48O3	37.7	0	2.22447	455.3549	59480.1	Oleanolic acid
205	38.49_279.2333m/z	279.233	38.493	M-H	C18H32O2	39.2	0	1.29887	279.2334, 115.9185	126938	9 , 12-octadecadienoic acid
206	39.10_255.2331m/z	255.233	39.105	M-H	C16H32O2	39.4	0	0.764197	255.2335, 61.9859, 186.9286	173902	Hexadecanoic acid
207	39.46_281.2490m/z	281.249	39.459	M-H	C18H34O2	43.9	26.1	1.44309	281.2493, 115.919, 61.986, 89.0219, 279.2338, 96.9578, 252.8597, 184.2048	121980	10-octadecenoic acid
208	40.49_283.2647m/z	283.265	40.4866	M-H	C18H36O2	42.4	17.7	1.55621	283.2647, 115.9187, 100.9314	297561	Stearic acid
209	50.96_253.2174m/z	253.217	50.9644	M-H	C16H30O2	39.1	0	0.560713	186.9283, 253.2168, 78.9568, 118.9402, 61.9858, 91.5843, 158.9333	58361.3	11z-hexadecenoic acid
