# Supplementary material for: Zuo Gui Wan Restores Bone Metabolism in Postmenopausal Osteoporosis through HIF-1 and PI3K–Akt Pathway Modulation: Evidence from UPLC– MS/MS and Network Analysis
Source: Research Square preprint supplement (doi:10.21203/rs.3.rs-8011125/v1), 2025-11-13
Supplement: Supplementary file 2 [file 22ef4985dd68e9ac34dad1b0.xlsx]

## Sheet: Sheet1
序号	化合物谱峰（保留时间_质荷比）	质荷比	保留时间(min)	加合物形式	分子式	母离子得分	碎片得分	质量误差（ppm）	碎片质荷比	峰面积	化合物名称	归属
No.	Compound	m/z	Retention time (min)	Adducts	Formula	Score	Fragmentation Score	Mass Error (ppm)	Fragments	Peak Area	Ingredient_id	Source
1	0.81_225.0612m/z	225.061	0.811633	M+FA-H	C6H12O6	46.2	35.2	-2.02582	179.0551, 78.9569, 110.0704, 87.0065, 154.0606, 96.9672, 92.9257, 80.9628, 104.033, 96.9579	179434	D-(+)-mannose	枸杞子, 山药
2	0.90_665.2167m/z	665.217	0.90365	M-H	C24H42O21	54.4	83.5	3.23938	59.0115, 71.0115, 89.0221, 101.0223, 665.2179, 179.0553, 113.0224, 383.121, 85.0272, 73.0272	3.59473e+06	Stachyose	地黄
3	1.27_275.0223m/z	275.022	1.26678	M-H	C10H12O7S	37.8	1.86	-2.90803	115.0017, 275.0226, 159.0093, 71.0115	853997	Dihydroisoferulic acid	枸杞子
4	1.29_504.1705n	549.169	1.2866	M-H, M+FA-H	C18H32O16	48	45.9	2.96121	59.0114, 71.0115, 89.0221, 503.1638, 101.0222, 179.0553, 113.0224, 85.0272, 119.033, 323.0984	2.37511e+06	Gentianose	地黄
5	1.57_337.0785m/z	337.079	1.57048	M-H	C12H18O11	52.3	65.4	2.64085	337.0791, 113.9939, 277.0577, 174.0156	5.4444e+06	2-o-alpha-d-glucopyranosyl -l-ascorbic acid	枸杞子
6	2.29_828.2785n	827.271	2.29265	M-H, M+FA-H	C30H52O26	52.7	73.5	4.56145	59.0114, 71.0114, 89.0222, 179.0552, 101.0222, 341.1099, 665.2142, 85.0273, 113.0221, 119.033	211609	Verbascose	地黄
7	3.10_362.1223n	407.12	3.09897	M-H, M+FA-H	C15H22O10	42.1	14.9	2.64941	97.0271, 71.0115, 199.0609, 169.0488, 85.0275, 59.0117, 361.1167, 61.986, 125.0225, 407.1198	615896	Catalpol	地黄
8	4.31_450.1387n	495.137	4.30913	M-H, M+FA-H	C18H26O13	43.1	21.8	2.91869	59.0114, 449.1283, 71.0116, 89.0221, 101.0224, 61.9861, 113.0219, 85.027, 87.0065, 125.0229	827326	5-[(6-o-alpha-d-glucopyranosyl -alpha-d-glucopyranosyl)oxymethyl] -2-furancarbaldehyde	地黄
9	4.55_361.0787m/z	361.079	4.54575	M-H	C14H18O11	53.3	72.7	2.89246	271.0467, 125.0228, 211.0244, 169.013, 168.0052, 59.0115, 124.0143, 71.0115, 361.0764, 107.0117	3.098e+06	7-o-galloyl-sedoheptulose	山茱萸
10	4.57_271.0830m/z	271.083	4.5745	M+FA-H	C11H14O5	45.1	31.4	3.09894	271.0831, 125.0224, 99.0427, 59.0114, 211.0249, 71.0115, 85.0272, 224.9705, 139.0385, 97.0273	46807.9	Cornin deglycosylation	山茱萸
11	4.69_288.0855n	333.084	4.69408	M-H, M+FA-H	C12H16O8	42.4	19	3.28329	59.0115, 71.0115, 80.9629, 93.0326, 125.0226, 113.4778, 85.0271, 214.0319, 261.0224, 113.71	232270	5-(alpha-d-glucopyranosyloxymethyl) -2-furancarboxaldehyde	地黄
12	5.41_362.1223n	407.121	5.40992	M-H, M+FA-H	C15H22O10	41.1	11.6	2.79184	71.0115, 59.0115, 61.9859, 89.022, 361.116, 99.0065, 72.9907, 407.1181, 101.0228, 389.1095	152337	(2s,3r,4r,5s,6r) -2-[[(1s,4as,5r,7ar) -4a,5-dihydroxy -7-(hydroxymethyl) -5,7a-dihydro-1h-cyclopenta[c]pyran -1-yl]oxy]-6-(hydroxymethyl)oxane -3,4,5-triol	地黄
13	5.68_391.1258m/z	391.126	5.67588	M+FA-H	C15H22O9	41.9	16.5	3.52595	59.0115, 97.0273, 71.0114, 391.127, 89.0219, 61.9861, 101.0223, 123.0437, 69.032, 113.0222	216052	Jioglutoside a	地黄
14	5.97_686.2297n	731.228	5.97302	M-H, M+FA-H	C27H42O20	43.1	21.8	4.02956	59.0115, 71.0115, 89.0219, 101.0223, 685.2273, 179.055, 221.0667, 113.0224, 85.027, 263.0769	2.11141e+06	Rhmannioside d	地黄
15	6.12_373.1149m/z	373.115	6.12163	M-H	C16H22O10	48.6	49.9	2.35531	123.0433, 59.0114, 71.0115, 193.0495, 149.0585, 373.1119, 89.022, 69.0323, 121.0638, 167.0692	388011	Swertiamarin	山茱萸
16	6.18_524.1756n	569.174	6.18168	M-H, M+FA-H	C21H32O15	40.6	7.53	2.81285	59.0114, 71.0114, 89.022, 119.0331, 179.0553, 101.0223, 523.169, 85.0273, 113.0219, 181.0506	1.19394e+06	Rehmannioside a	地黄
17	6.81_393.1415m/z	393.141	6.81285	M+FA-H	C15H24O9	47.4	44.7	3.60578	393.1393, 59.0115, 61.986, 71.0116, 167.0701, 246.3528, 347.1358, 184.9187, 127.0389, 141.0328	125649	Ajugol	地黄
18	8.54_345.1198m/z	345.12	8.54378	M-H	C15H22O9	51.4	65.9	2.11318	59.0115, 71.0114, 299.1143, 89.0221, 163.06, 345.12, 119.0485, 85.0271, 101.0219, 119.0328	40541.8	Aucubin	地黄
19	8.78_449.1312m/z	449.131	8.78377	M+FA-H	C17H24O11	47.9	47.1	2.85685	449.1306, 59.0114, 95.0479, 101.022, 89.0221, 139.0018, 71.0115, 127.0386, 68.996, 241.0722	1.11571e+06	7,8-dehydropenstemoside	山茱萸
20	9.46_487.1468m/z	487.147	9.4634	M-H	C21H28O13	42	16.3	2.20173	119.0483, 163.0388, 145.028, 117.0326, 487.1489	613209	Cistanoside f	地黄
21	9.97_406.1484n	451.147	9.96557	M-H, M+FA-H	C17H26O11	44.6	26.9	2.22255	101.0223, 155.0336, 243.0882, 141.0541, 95.0116, 68.9958, 59.0115, 405.1437, 123.0431, 71.0115	7.53569e+07	Methyl 3 -hydroxy-1-methyl-8-[3,4,5-trihydroxy -6-(hydroxymethyl)oxan -2-yl]oxy-1,3,4,4a,8,8a -hexahydropyrano[3,4 -c]pyran-5-carboxylate	山茱萸
22	9.97_354.0958n	353.089	9.96557	M-H, M+Na-2H	C16H18O9	49.4	53.2	2.08842	59.0114, 69.0322, 213.0765, 71.0114, 95.0482, 113.0223, 135.0435, 375.0712, 89.0222, 169.0859	4.64622e+06	Chlorogenic acid	菟丝子
23	10.21_376.1377n	375.13	10.2094	M-H, M+FA-H	C16H24O10	45.3	32.8	1.89456	375.1308, 69.0322, 59.0116, 336.4576, 416.7419, 179.0317, 119.612, 211.7111, 409.7247, 71.0114	5.50883e+06	8-epiloganic acid	地黄
24	10.83_483.0795m/z	483.079	10.8319	M-H	C20H20O14	55.8	88.8	2.99594	125.0226, 169.013, 331.0685, 483.076, 439.089, 287.0773, 313.0577	51528.3	Gallic acid -3-o-(6'-o-galloyl)glucoside	山茱萸
25	10.86_447.1522m/z	447.152	10.8613	M+FA-H	C18H26O10	51.7	64.8	3.41117	269.1031, 71.0113, 59.0114, 401.1463, 101.0224, 61.9859, 447.1532, 85.0268, 161.0445, 73.0271	100403	Acetylcatalpol	地黄
26	11.19_517.1572m/z	517.157	11.1929	M-H	C22H30O14	44.1	28.8	1.75818	160.0154, 134.0356, 193.0497, 175.0391, 132.0199, 517.1567, 178.0264, 59.0114, 71.0117, 61.9859	193320	6'-o-beta-d-glucosylgentiopicroside	地黄
27	11.37_515.1552m/z	515.155	11.3722	M+Na-2H	C24H30O11	47.3	52.1	3.41173	515.1568, 61.9859, 191.0552, 134.0353, 96.958, 261.1071, 140.8162, 119.8028, 173.9321, 121.6661	86368.2	6-o-p-coumaroylajugol	地黄
28	11.37_625.1431m/z	625.143	11.3722	M-H	C27H30O17	47.9	46.7	3.28924	271.0261, 299.0213, 462.0861, 301.0359, 625.145, 151.0019, 243.0306	517741	Quercetin -3-o-galactoside -7-o-glucoside	菟丝子
29	11.52_355.1044m/z	355.104	11.5221	M+FA-H	C15H18O7	45	31.9	2.94583	134.0356, 193.0499, 178.026, 149.0587, 191.0556, 137.0228, 160.015, 59.0115	164443	Mellitoxin	地黄
30	11.64_284.1630n	283.156	11.642	M-H, M+FA-H	C15H24O5	41.3	11.9	2.07851	147.0435, 59.0115, 91.5887, 328.112, 71.0113, 101.0222, 72.9903, 193.0266, 219.1524, 218.2528	88330.4	Sec-hydroxyaeginetic acid	地黄
31	12.32_613.1905m/z	613.191	12.3229	M+Na-2H	C29H36O13	34.3	1.17	0.408266	61.986, 245.0933, 613.1913, 98.0225, 116.0489, 203.0824, 59.0115, 74.0222, 227.0835, 101.0222	158058	Jionoside c	地黄
32	12.43_421.1643m/z	421.164	12.4348	M+Na-2H	C23H28O6	36.9	5.41	2.67762	61.986, 91.5825, 164.5695, 63.9903, 57.7497, 61.2336, 56.0228, 64.9503	99963.9	Hancinone c	山药
33	12.43_358.1270n	403.125	12.4348	M-H, M+FA-H	C16H22O9	42	15.9	1.78224	403.1248, 81.0322, 125.0227, 59.0115, 89.0223, 71.0115, 195.0658, 160.8282, 121.3075, 130.5952	7.81503e+06	Sweroside	山茱萸
34	13.41_227.0919m/z	227.092	13.4134	M-H	C11H16O5	38.4	7.16	-2.50252	67.0165, 127.0381, 101.0223, 68.9958, 59.0114, 227.092, 225.1129, 181.0754, 180.912, 152.9163	121504	8-epiloganin deglycosylation	山茱萸
35	13.41_390.1530n	435.151	13.4134	M-H, M+FA-H	C17H26O10	42.9	17.5	1.15514	435.151, 101.0222, 127.038, 227.0926, 67.0165, 290.961, 132.235, 297.9468, 111.4073, 128.3806	5.56212e+07	7-epi-loganin	山茱萸
36	13.50_785.2536m/z	785.254	13.4957	M-H	C35H46O20	45.5	37	3.32266	161.023, 133.0276, 135.0435, 785.2499, 101.0222, 59.0114, 71.0114, 623.2191, 91.5819, 127.0382	457715	Purpureaside b	地黄
37	13.68_446.1802n	491.178	13.6761	M-H, M+FA-H	C20H30O11	38.3	3.17	3.14525	59.0115, 101.0223, 445.1737, 61.986, 71.0115, 89.0219, 488.1638, 454.291, 472.8304, 470.9318	49046.3	Cistanoside g	地黄
38	14.73_465.1623m/z	465.162	14.7303	M+FA-H	C18H28O11	38.9	1.15	2.22844	61.986	68702.3	7-o-methyl morroniside	山茱萸
39	14.88_799.2695m/z	799.269	14.8806	M-H	C36H48O20	52.4	70.5	3.55961	160.0151, 799.2702, 175.0393, 623.2236, 59.0114, 132.02, 134.0355, 71.0115, 123.0429, 135.0438	628816	Jionoside a1	地黄
40	15.30_607.1690m/z	607.169	15.2995	M-H	C28H32O15	38.9	5.4	3.4714	119.0483, 93.0325, 145.0279, 137.0231, 163.0392, 161.0226, 59.0116, 61.986, 281.0667, 607.1708	46774.1	Physcion-8-o-beta-d-gentiobioside	枸杞子
41	15.54_433.1360m/z	433.136	15.5404	M+FA-H	C17H24O10	40.5	6.39	2.22896	59.0114, 155.0337, 71.0115, 95.0116, 152.9942, 433.1353, 78.9567, 91.5816, 101.0223, 225.0782	315692	Geniposide	地黄
42	15.96_595.1320m/z	595.132	15.9634	M-H	C26H28O16	56.4	86.3	2.60791	300.0283, 271.0258, 595.1315, 255.0306, 243.0302	5.97477e+06	Quercetin 3 -apiosyl-(1->2)-galactoside	菟丝子
43	16.12_527.1418m/z	527.142	16.1151	M+FA-H	C22H26O12	39.9	4.49	2.47524	125.0226, 169.013, 527.1447, 107.0119, 59.0115, 61.986, 69.0322, 71.0115, 375.13, 89.022	102321	Catalposide	地黄
44	16.15_433.2088m/z	433.209	16.1459	M+FA-H	C19H32O8	39.5	2.6	2.28532	59.0115, 71.0113, 433.1645, 433.209, 78.9565, 249.0629, 61.9859, 85.0272, 152.9947, 75.0065	152250	Rehmaionoside c	地黄
45	16.18_520.1957n	519.188	16.1758	M-H, M+FA-H	C26H32O11	47.2	42.1	2.3575	136.0148, 151.0385, 357.1364, 61.986, 119.0483, 519.1915, 414.7548, 434.6969, 121.0281, 108.0192	226647	(+)-pinoresinol 4 -o-beta-d-glucopyranoside	菟丝子
46	16.30_624.2072n	623.2	16.2966	M-H, M+Na-2H	C29H36O15	47	39.4	2.77798	645.1884, 153.0544, 161.0231, 123.0432, 61.986, 133.0279, 135.0434, 319.0815, 71.0115, 207.0275	1.48652e+06	Isoacteoside	地黄
47	16.63_515.1205m/z	515.12	16.6304	M-H	C25H24O12	48.1	50.3	1.91056	191.055, 135.0435, 179.0336, 353.0892, 85.0272, 161.0229, 61.9859	70309.1	3,4-dicaffeoylquinic acid	菟丝子
48	16.87_813.2857m/z	813.286	16.8731	M-H	C37H50O20	44.1	28.7	4.21996	160.0152, 175.0392, 813.289, 132.0199, 134.0356, 59.0114, 71.0115, 193.0499, 89.022	352866	Wiedemannioside c	地黄
49	17.14_464.0964n	463.089	17.1422	M-H, M+Na-2H	C21H20O12	55.3	80.2	2.07665	323.0183, 151.0022, 271.0251, 301.0354, 107.0118, 300.028, 485.0724, 256.0371, 65.0006, 255.03	2.68104e+07	Hyperoside	菟丝子
50	17.17_435.2242m/z	435.224	17.173	M+FA-H	C19H34O8	49.6	52.4	1.56072	435.2247, 59.0115, 71.0114, 389.2212, 91.5888, 89.0222, 189.3459, 148.6656, 85.0348	916812	Rehmaionoside a	地黄
51	17.32_536.2998n	581.298	17.3235	M-H, M+FA-H	C29H44O9	48	45.3	2.33895	535.2922, 125.0589, 391.2141, 61.9859, 285.0382, 581.2969, 227.0337, 256.0341, 255.0309, 85.0272	346971	Sengosterone	川牛膝
52	17.38_609.1478m/z	609.148	17.3837	M-H	C27H30O16	53.4	71.3	2.74749	271.0256, 300.0283, 609.1491, 255.0306, 243.0303, 314.0446, 151.0019, 299.0207, 227.0353, 107.0119	3.8959e+06	Quercetin 3 -o-rhamnopyranosyl	枸杞子
53	17.62_259.0977m/z	259.098	17.6234	M-H	C15H16O4	37.7	0	0.348718	259.0983, 258.1018, 171.0821, 87.0043, 259.0247	61459.9	Tristin	山药
54	18.20_515.1205m/z	515.12	18.1961	M-H	C25H24O12	44.1	25.4	1.93575	135.0435, 173.0445, 93.0324, 179.0339, 191.0555, 515.121, 353.0892, 161.0238, 91.5823, 61.9861	103364	3,5-di-o-caffeoylquinic acid	菟丝子
55	18.29_359.0782m/z	359.078	18.2879	M+FA-H	C17H14O6	49.2	52.8	2.95744	161.0231, 133.0278, 135.0434, 72.9907, 123.0431, 197.0449, 179.0338, 359.0785	69529.7	Nepetoidin b	地黄
56	18.53_447.0941m/z	447.094	18.5311	M-H	C21H20O11	54.1	74.6	1.84394	227.0349, 255.0306, 284.0336, 447.0949, 285.0398	423741	Kaempferol 3 -o-bata-d-galactopyranoside	菟丝子
57	18.59_377.1824m/z	377.182	18.59	M+FA-H	C16H28O7	39.1	0.663	2.0142	130.0854, 61.9862, 376.2271, 295.4283, 216.6333, 111.0799, 232.7004, 140.995, 289.0255, 98.3424	231464	Angelicoidenol 2 -o-beta-d-glucopyranoside	枸杞子
58	18.62_520.3047n	565.303	18.6175	M-H, M+FA-H	C29H44O8	43.4	21.7	2.07023	565.3041, 519.2982, 87.0428, 85.0274, 91.5888	1.16133e+07	Precyasterone	川牛膝
59	18.62_541.1574m/z	541.157	18.6175	M-H	C24H30O14	46.4	35.6	2.02639	125.0226, 169.013, 541.1583	1.7976e+07	Cornuside	山茱萸
60	18.62_637.2158m/z	637.216	18.6175	M-H	C30H38O15	35.5	11.6	3.08198	161.0231, 96.9579, 133.0278, 637.2233, 195.0098, 116.9265, 71.0114, 151.0193, 59.0115, 145.0277	77907	Jionoside d	地黄
61	18.62_709.3545m/z	709.355	18.6175	M+Na-2H	C38H56O11	32.4	1.63	-3.46647	709.3575, 125.0954, 187.0967, 127.049, 214.156, 428.2208, 467.2278, 97.0641, 101.0699, 259.1478	69242.6	Methylcimicifugoside	山药
62	18.85_505.1002m/z	505.1	18.8549	M-H	C23H22O13	52.2	70.8	2.83155	271.0257, 300.0285, 505.1005, 243.0305, 255.0304, 227.0344, 151.0022	51346.3	6'-o-acetylhyperoside	菟丝子
63	18.89_232.1308n	231.124	18.8859	M-H, M+Na-2H	C11H20O5	48.2	45.1	-0.992415	193.0839, 253.1062, 145.988, 235.0952, 164.9953, 189.9957, 166.9917, 190.9923, 253.0516, 116.9937	67890.8	Jioglutin e	地黄
64	19.16_477.1049m/z	477.105	19.1556	M-H	C22H22O12	46.3	35.7	2.24275	243.0303, 271.0255, 314.0446, 477.106, 270.0177, 285.0409, 242.0227, 257.0465, 299.0206, 227.0353	1.1589e+06	Isorhamnetin 3 -galactoside	菟丝子
65	19.16_593.1529m/z	593.153	19.1556	M-H	C27H30O15	55.4	84.4	2.84623	255.0306, 285.041, 227.0351, 593.1531, 284.0338, 229.0511, 257.0461	206976	Kaempferol 3 -o-alpha-l-rhamnopyranosyl(1 ->6)-beta-d-galactopyranoside	菟丝子
66	19.25_312.1251m/z	312.125	19.2464	M-H	C18H19NO4	46.2	38	3.09303	148.0514, 312.1254, 178.0495, 135.0434, 190.0499, 297.1018, 147.0438, 134.0359	96709.4	Lyciumide a	枸杞子
67	19.28_583.1112m/z	583.111	19.2765	M-H	C28H24O14	47.9	46.7	3.15307	300.0286, 271.0258, 61.986, 583.1107, 255.0306, 243.0298, 463.0875, 151.0021, 107.012	60614.6	P-hydroxybenzoyl -quercetin -3-o-galactoside	菟丝子
68	20.18_651.2316m/z	651.232	20.1779	M-H	C31H40O15	46.1	35.8	3.26467	160.0152, 175.039, 651.2322, 132.0199, 134.0355, 59.0115, 113.0224, 85.0272, 71.0114, 193.05	400064	Martynoside	地黄
69	20.36_523.1832m/z	523.183	20.359	M-H	C25H32O12	47.7	45.3	2.16643	134.0356, 193.0497, 160.0152, 523.1852, 132.0201, 175.039, 178.0266, 117.0326	87014.5	6-feruloylajugol	地黄
70	20.39_539.3240m/z	539.324	20.389	M+FA-H	C28H46O7	53.5	72	2.84732	539.3253, 493.3211, 173.1175	580410	Makisterone b	川牛膝
71	21.20_609.1269m/z	609.127	21.1981	M-H	C30H26O14	40.5	9.19	3.15856	271.0257, 300.0285, 255.0306, 609.1282, 463.0901, 151.0024, 243.0304, 227.0345, 163.0024	195458	Kaempherol 3 -(6-caffeoylglucoside)	菟丝子
72	21.23_301.0359m/z	301.036	21.2288	M-H	C15H10O7	49.4	51.3	1.83433	301.0363, 151.0022, 107.0118, 121.0275, 65.0009, 178.9977, 83.0115, 63.0216, 93.0323	654718	Quercetin	川牛膝
73	21.98_553.3397m/z	553.34	21.9776	M+FA-H	C29H48O7	47.8	43.7	2.9811	553.3407, 507.3347, 319.1928, 91.5894, 61.986, 113.0955, 187.1334, 162.0263, 447.7, 160.5961	449537	Amarasterone a2	川牛膝
74	22.67_664.2024n	663.195	22.6653	M-H, M+FA-H	C31H36O16	47.1	42.8	3.0766	369.0991, 663.1957, 108.0197, 121.0277, 84.0193, 136.0149, 165.018	371296	Cuscutoside b	菟丝子
75	23.44_285.0410m/z	285.041	23.4373	M-H	C15H10O6	45.7	34.4	2.00321	285.0414, 216.9894, 178.9911, 244.9843, 93.0324	123393	Kaempferol	菟丝子
76	24.35_549.3084m/z	549.308	24.3505	M+FA-H	C29H44O7	38.6	0	2.89639	549.3109, 61.9862, 91.5826, 354.2841, 362.6509, 438.8607, 261.1746, 61.9235, 352.495, 89.7823	125961	Capitasterone	川牛膝
77	25.12_643.2791m/z	643.279	25.1152	M+Na-2H	C38H42N2O6	48.4	55	0.242896	122.0593, 152.0701, 643.2762, 611.2526, 489.1909, 402.1829, 120.0798, 223.0879, 444.1975, 458.3611	42808.3	Isotetrandrine	山茱萸
78	28.13_287.2234m/z	287.223	28.1277	M+FA-H	C15H30O2	44.9	30.5	2.74256	287.2239	318897	Pentadecylic acid	地黄, 枸杞子
79	28.45_269.0825m/z	269.083	28.4489	M-H	C16H14O4	46	36.3	2.16959	269.0829, 210.0685, 254.0593, 225.0556, 253.0515, 209.0605	77362.2	3,5-dimethoxy -2,7-phenanthrenediol	山药
80	30.81_497.1688m/z	497.169	30.8064	M-H	C23H30O12	39	5.95	4.67041	171.9825, 497.167, 108.0196, 79.955, 93.0323, 289.0555	259632	6-o-vanilloylajugol	地黄
81	32.68_315.2546m/z	315.255	32.6771	M+FA-H	C17H34O2	43.2	20.4	1.86084	315.2548, 315.2014, 313.2412	127875	Daturic acid	地黄
82	32.76_269.2128m/z	269.213	32.7628	M-H	C16H30O3	41.9	14.5	2.12362	269.2132, 98.9537, 267.1453	267932	11-hexadecanoic acid	龟板
83	37.47_457.2372m/z	457.237	37.4718	M+Na-2H	C28H36O4	38	0	2.73288	78.9567, 152.9943, 457.2375, 96.9675	220946	Daturilin	地黄
84	38.32_455.3541m/z	455.354	38.3168	M-H	C30H48O3	37.7	0	2.22447	455.3549	59480.1	Oleanolic acid	川牛膝, 山茱萸肉
85	38.49_279.2333m/z	279.233	38.493	M-H	C18H32O2	39.2	0	1.29887	279.2334, 115.9185	126938	9 , 12-octadecadienoic acid	枸杞子, 龟板
86	39.10_255.2331m/z	255.233	39.105	M-H	C16H32O2	39.4	0	0.764197	255.2335, 61.9859, 186.9286	173902	Hexadecanoic acid	地黄, 龟板, 山茱萸, 川牛膝, 山药, 枸杞子
87	39.46_281.2490m/z	281.249	39.459	M-H	C18H34O2	43.9	26.1	1.44309	281.2493, 115.919, 61.986, 89.0219, 279.2338, 96.9578, 252.8597, 184.2048	121980	10-octadecenoic acid	龟板
88	40.49_283.2647m/z	283.265	40.4866	M-H	C18H36O2	42.4	17.7	1.55621	283.2647, 115.9187, 100.9314	297561	Stearic acid	地黄, 山茱萸
89	50.96_253.2174m/z	253.217	50.9644	M-H	C16H30O2	39.1	0	0.560713	186.9283, 253.2168, 78.9568, 118.9402, 61.9858, 91.5843, 158.9333	58361.3	11z-hexadecenoic acid	枸杞子
