# Supplementary material for: Zuo Gui Wan Restores Bone Metabolism in Postmenopausal Osteoporosis through HIF-1 and PI3K–Akt Pathway Modulation: Evidence from UPLC– MS/MS and Network Analysis
Source: Research Square preprint supplement (doi:10.21203/rs.3.rs-8011125/v1), 2025-11-13
Supplement: Supplementary file 3 [file 2e43d1e1c776d7753c82c813.docx]

Supplementary 1 Table S1 Drug-containing serum metabolites of ZWG

| No. | metabolite | m/z | Retention time (min) | Adducts | MetID | Mass Error (ppm) | Fragments | metabolite_id | POS-GYX |
| --- | --- | --- | --- | --- | --- | --- | --- | --- | --- |
| 1 | 11.84_357.0839m/z | 357.0839 | 11.84 | M-H | M-H-H4 | 3.19 | 166.0258, 181.0496, 151.0022, 316.4226, 71.0115, 174.9553, 87.0062, 127.4224, 338.8285, 167.6916 | (2s,3r,4r,5s,6r) -2-[[(1s,4as,5r,7ar) -4a,5-dihydroxy -7-(hydroxymethyl) -5 | 6554.53 |
| 2 | 5.67_184.0427m/z | 184.0427 | 5.67 | M+Na | M+Na-H2O | 1.15 |  | 2-amino-2-deoxy-alpha-d-glucopyranose | 10391.33 |
| 3 | 5.35_163.0866m/z | 163.0866 | 5.35 | M+Na | M+Na+H2O | 8.98 |  | 2-phenylethanol | 2102.93 |
| 4 | 10.09_326.1000n | 344.1339 | 10.09 | M+NH4 | M+NH4+C6H8O6 | 1.96 | 349.0885, 237.9682, 143.9891, 313.2645, 61.0673, 56.6788, 89.6553, 50.8584, 70.8603, 70.2397 | 2-phenylpropionic acid | 132649.90 |
| 5 | 5.11_200.0554m/z | 200.0554 | 5.11 | M+NH4 | M+NH4+CO | 2.47 |  | 3,4-dihydroxybenzoic acid | 4887.32 |
| 6 | 13.42_229.1070m/z | 229.1070 | 13.42 | M+H | M+H | 0.15 | 81.0709, 109.0653, 105.0704, 179.0701, 133.0647, 151.0753, 55.0557, 79.0552, 95.0863, 91.0548 | 7-epi-loganin | 22249.53 |
| 7 | 10.21_375.1306m/z | 375.1306 | 10.21 | M-H | M-H | 2.49 | 69.0322, 59.0115, 375.1299, 71.0114, 213.0761, 95.0481, 113.022, 346.8984, 253.8216, 169.085 | 8-epiloganic acid | 9273.60 |
| 8 | 13.42_390.1525n | 408.1864 | 13.42 | M+NH4 | M+NH4 | 1.48 | 413.14, 309.4428, 78.6148, 351.7958, 216.836, 217.334, 79.6238, 71.0306, 61.3702 | 8-epiloganin deglycosylation | 55076.56 |
| 9 | 3.13_407.1203m/z | 407.1203 | 3.13 | M+FA-H | M+FA-H | 2.06 | 406.9942, 386.7019, 192.3468, 134.4338, 150.0375, 85.0506, 158.8873, 64.9398, 115.7303, 107.479 | Catalpol | 10291.47 |
| 10 | 0.91_205.0818m/z | 205.0818 | 0.91 | M+Na | M+Na+C4H6O | 8.33 |  | Dehydromevalonic lactone | 11948.39 |
| 11 | 7.36_213.1231m/z | 213.1231 | 7.36 | M+NH4 | M+NH4+CH2 | 3.85 | 135.0919, 213.1232, 149.1075, 177.1021, 70.0663, 80.0505, 95.0498, 195.1122, 53.04, 147.0911 | Dl-tyrosine | 51603.62 |
| 12 | 27.98_456.2954m/z | 456.2954 | 27.98 | M+NH4 | M+NH4+C6H8O6 | 1.50 |  | Farnesylacetone | 15858.09 |
| 13 | 12.68_401.1098m/z | 401.1098 | 12.68 | M-H | M-H+O-H2 | 2.12 | 101.0222, 68.9957, 401.1112, 225.0767, 85.0272, 123.0429, 325.0967, 383.8337, 162.4376, 87.6253 | Geniposide | 11487.81 |
| 14 | 9.32_369.0834m/z | 369.0834 | 9.32 | M+FA-H | M+FA-H+O-H2 | 1.75 | 134.0359, 178.0261, 193.0504, 59.0115, 149.0593, 85.0272, 71.0114, 137.0234, 219.1576, 87.0066 | Mellitoxin | 5553.28 |
| 15 | 1.53_288.1074m/z | 288.1074 | 1.53 | M+NH4 | M+NH4+CO | 3.34 | 108.045, 126.055, 105.0703, 61.0297, 57.0713, 85.0292, 131.0856, 81.0708, 91.0553, 73.0294 | Methyl (1r,4ar,5r,7as) -1,4a,5-trihydroxy -7-methyl-5,7a-dihydro-1h-cyclopenta[c]pyran -4-carboxylate | 8026.22 |
| 16 | 9.97_429.1368m/z | 429.1368 | 9.97 | M+Na | M+Na | 0.07 | 429.136, 91.0583, 73.0479, 167.0555, 359.0273, 91.5841, 305.7016, 333.7935, 392.298, 418.1179 | Methyl 3 -hydroxy-1-methyl-8-[3,4,5-trihydroxy -6-(hydroxymethyl)oxan -2-yl]oxy-1,3,4,4a,8,8a -hexahydropyrano[3,4 -c]pyran-5-carboxylate | 54440.44 |
| 17 | 11.44_185.1286m/z | 185.1286 | 11.44 | M+NH4 | M+NH4+H2 | 2.35 | 105.0341, 86.0974, 185.1287, 72.0456, 88.9535, 140.1065, 84.9607, 95.0498, 183.0801, 112.1124 | Phenylalanine | 11610.73 |
| 18 | 24.63_380.2617m/z | 380.2617 | 24.63 | M+NH4 | M+NH4-CO | 8.36 | 105.0708, 133.0652, 134.073, 135.0801, 165.0368, 86.0976, 295.1727, 91.5782, 79.0555, 91.0553 | Rehmaionoside a | 14977.60 |
| 19 | 12.46_403.1256m/z | 403.1256 | 12.46 | M+FA-H | M+FA-H | 2.57 | 61.9859, 403.1245, 302.0346, 267.7018, 276.6727, 54.0216, 103.9241, 52.0489, 60.621 | Sweroside | 32438.30 |
| 20 | 12.08_219.1128m/z | 219.1128 | 12.08 | M+H | M+H+CH2 | 0.06 | 120.081, 203.143, 84.9606, 91.055, 72.0456, 103.0548, 205.1584, 219.1122, 146.0962, 56.9662 | Tryptophan | 17638.29 |
